# Supplementary material for: Dietary Abrasiveness Is Associated with Variability of Microwear and Dental Surface Texture in Rabbits
Source: PubMed Central journal article supplement (PMC3566079; doi:10.1371/journal.pone.0056167), 2013-02-06
Supplement: pone.0056167.s001.pdf [file pone.0056167.s001.pdf]

## Supporting Information (S1)

### Figure S1. Examples of cecotrophs in the stomach of rabbits.

Examples of cecotrophs visible in the stomachs of rabbits at dissection, a) from a teaching course and b) and c) from animals used in this study (scale = 2cm). Note that cecotrophs appear in the stomach intact, indicating that they are not subjected to mastication, i.e. that the practice of coprophagy is unlikely to contribute significantly to overall tooth wear.

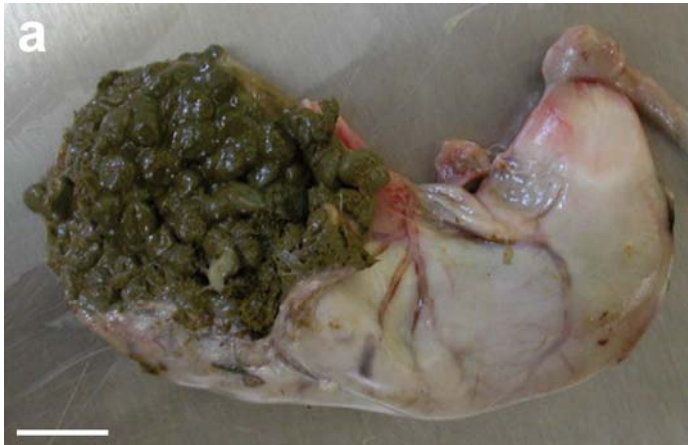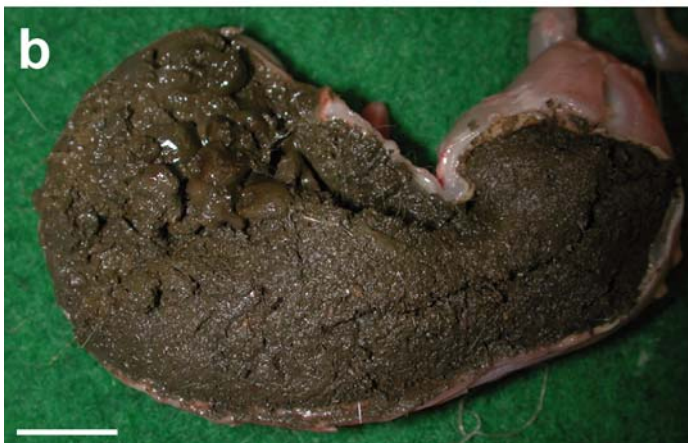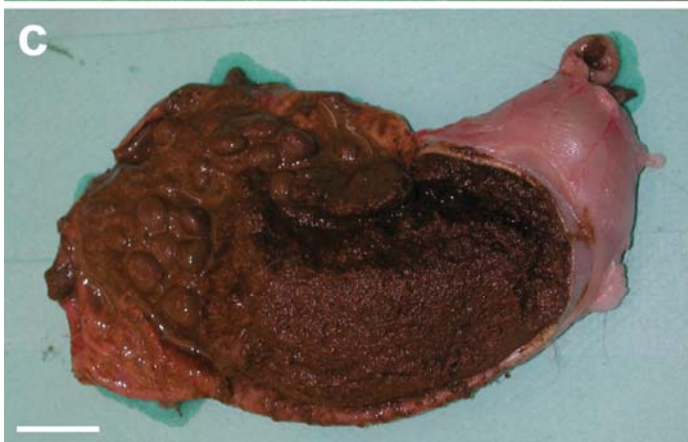

8  
9  
10  
11

12 **Table S1. Groupwise comparison of microwear and 3D texture parameters.**

13 Groupwise comparison of microwear ( $Ls$  = length of scratches,  $Np$  = number of pits,  $Np10$  =  
 14 number of the ten largest pits), silica ( $SC$  [%]) and 3D texture parameters ( $Sal$  = auto  
 15 correlation length [ $\mu\text{m}$ ],  $Sda$  = closed dale area [ $\mu\text{m}^2$ ],  $Sdr$  = developed interfacial area [%],  
 16  $Sdq$  = root mean square gradient,  $Sp$  = maximum peak height [ $\mu\text{m}$ ],  $Ssk$  = skewness,  $Sv$  =  
 17 maximum pit height [ $\mu\text{m}$ ],  $Sxp$  = extreme peak height [ $\mu\text{m}$ ],  $Sz$  = maximum height [ $\mu\text{m}$ ],  $S5v$   
 18 = five point pit height [ $\mu\text{m}$ ],  $Vvv$  = pit void volume [ $\mu\text{m}^3/\mu\text{m}^2$ ]). Bold lettering =  $p \leq 0.05$  for  
 19 WY/PW/CM-tests, regular =  $p \leq 0.05$  in one test only) for the given pair of feeding groups (G  
 20 = grass meal, GO = grass meal with crushed oats, LO = lucerne with crushed oats, and L =  
 21 lucerne) for the primary surface (A), S-F surface (B), and S-L surface (C). Statistical analysis  
 22 in R are applied using the packages xlsReadWrite 1.5.4 (Sutter H.-P., [http://CRAN.R-](http://CRAN.R-project.org/package=xlsReadWrite)  
 23 [project.org/package=xlsReadWrite](http://CRAN.R-project.org/package=xlsReadWrite)), doBy 4.2.3 (Højsgaard S., Wright K., Leidi A. A.,  
 24 <http://CRAN.R-project.org/package=doBy>), R.utils 1.6.2 (Bengtsson, H., [http://CRAN.R-](http://CRAN.R-project.org/package=R.utils)  
 25 [project.org/package=R.utils](http://CRAN.R-project.org/package=R.utils)), RSvgDevice 0.6.4.1 (Luciani, T. J.,  
 26 <http://www.darkridge.com/~jake/RSvg/>) and WRS 0.12.1 (Wilcox, R. R., Schoenbrodt F.,  
 27 <http://R-Forge.R-project.org/projects/wrs/>).

| <b>Group 1</b> | <b>GO</b>                          | <b>GO</b>       | <b>GO</b>                             | <b>G</b>    | <b>G</b>   | <b>LO</b> |
|----------------|------------------------------------|-----------------|---------------------------------------|-------------|------------|-----------|
| <b>Group 2</b> | <b>G</b>                           | <b>LO</b>       | <b>L</b>                              | <b>LO</b>   | <b>L</b>   | <b>L</b>  |
| Silica         | <i>SC</i>                          | <i>SC</i>       | <i>SC</i>                             | <i>SC</i>   | <i>SC</i>  | <i>SC</i> |
| Microwear      | <i>Ls, Np, Np10</i>                | <i>Ls, Np</i>   | <i>Ls, Np</i>                         | <i>Np10</i> | none       | none      |
| Texture (A)    | <i>Sda</i>                         | <i>Sda, Sdv</i> | <i>Sda</i>                            | none        | none       | none      |
| Texture (B)    | <i>Sz, Sdr, Sdq</i>                | none            | none                                  | none        | none       | none      |
| Texture (C)    | <i>S5v, Sal, Sp, Ssk, Sdr, Sdq</i> | <i>Sz</i>       | <i>S5v, Sp, Ssk, Sv, Sxp, Sz, Vvv</i> | <i>Ssk</i>  | <i>Sal</i> | none      |

28  
 29  
 30

31 **Table S2. Descriptive statistics of microwear parameters.**  
 32 Descriptive statistical values (M = mean and SD = standard deviation) given for the feeding groups (G = grass  
 33 meal, GO = grass meal with crushed oats, LO = lucerne with crushed oats, and L = lucerne). Key to lettering:  
 34 silica content of 1g animal feed (*S* in mg/g), percentage of silica content (*SC* in %) and the microwear parameters  
 35 (*Np* = number of pits, *Np10* = number of pits >10µm, *Np5* = number of pits >5µm, *Ns* = number of scratches,  
 36 *Nws5* = number of scratches wider than 5µm, *Nws10* = number of scratches wider than 10µm, *Ls* = length of  
 37 scratches), n = number of specimen.

| Group<br>Parameter | G     |      | GO    |      | L     |       | LO    |       |
|--------------------|-------|------|-------|------|-------|-------|-------|-------|
|                    | M     | SD   | M     | SD   | M     | SD    | M     | SD    |
| <i>S</i>           | 11.96 | 3.24 | 9.33  | 2.06 | 0.93  | 0.99  | 0.12  | 0.23  |
| <i>SC</i>          | 1.20  | 0.32 | 0.93  | 0.21 | 0.09  | 0.10  | 0.01  | 0.02  |
| n                  | 10    |      | 10    |      | 10    |       | 10    |       |
| <i>Np</i>          | 21.71 | 4.72 | 32.92 | 9.00 | 45.86 | 14.76 | 39.42 | 11.72 |
| <i>Np10</i>        | 0.43  | 0.53 | 2.58  | 1.80 | 0.43  | 0.79  | 2.58  | 2.40  |
| <i>Np5</i>         | 4.14  | 1.82 | 7.58  | 3.47 | 6.36  | 5.42  | 7.42  | 4.52  |
| <i>Ns</i>          | 8.71  | 3.60 | 5.67  | 1.97 | 4.50  | 1.94  | 4.25  | 3.27  |
| <i>Nws5</i>        | 0.93  | 1.02 | 1.33  | 0.52 | 0.21  | 0.39  | 0.17  | 0.41  |
| <i>Nws10</i>       | 0.25  | 0.55 | 0.14  | 0.36 | 0     | 0     | 0     | 0     |
| <i>Ls</i>          | 59.05 | 4.78 | 50.40 | 6.63 | 38.94 | 9.63  | 48.60 | 5.93  |
| n                  | 7     |      | 6     |      | 6     |       | 7     |       |

38

39 **Table S3. Descriptive statistics of 3D texture parameters.**

40 Descriptive statistical values (M = mean and SD = standard deviation) given for the 3D texture parameters (Pa) grouped by the three surface types (A, B, C) and feeding groups  
 41 (G = grass meal, GO = grass meal with crushed oats, LO = lucerne with crushed oats, and L = lucerne). Key to lettering of the parameters: *Sa* = arithmetical mean height [ $\mu\text{m}$ ],  
 42 *Sal* = auto-correlation length ( $s = 0.2$ , [ $\mu\text{m}$ ]), *Sda* = closed dale area [ $\mu\text{m}^2$ ], *Sdq* = root mean square gradient of the scale limited surface, *Sdr* = developed interfacial area ratio of  
 43 the scale limited surface [%], *Sdv* = closed dale volume [ $\mu\text{m}^3$ ], *Sha* = mean hill area [ $\mu\text{m}^2$ ], *Shv* = closed hill volume [ $\mu\text{m}^3$ ], *Sku* = kurtosis of the scale limited surface, *Smc* =  
 44 areal material ratio function of the scale limited surface ( $p = 10\%$ , [ $\mu\text{m}$ ]), *Smr* = areal material ratio function of the scale limited surface ( $c = 1 \mu\text{m}$  under the highest peak [%]), *Sp*  
 45 = maximum peak height [ $\mu\text{m}$ ], *Spc* = arithmetic mean peak curvature [ $1/\mu\text{m}$ ], *Spd* = density of peaks [ $1/\mu\text{m}^2$ ], *Sq* = root mean square height of the scale limited surface [ $\mu\text{m}$ ], *Ssk*  
 46 = skewness of the scale limited surface, *Std* = texture direction [ $^\circ$ ], *Str* = texture aspect ratio ( $s = 0.2$ ), *Sv* = maximum pit height [ $\mu\text{m}$ ], *Sxp* = peak extreme height difference in  
 47 height between  $p\%$  and  $q\%$  ( $p = 50\%$ ,  $q = 97.5\%$ , [ $\mu\text{m}$ ]), *Sz* = maximum height of the scale limited surface [ $\mu\text{m}$ ], *SIOz* = ten-point height of the surface [ $\mu\text{m}$ ], *S5p* = five-point  
 48 peak height [ $\mu\text{m}$ ], *S5v* = five-point valley height [ $\mu\text{m}$ ], *Vm* = material volume at a given height ( $p = 10\%$  [ $\mu\text{m}^3/\mu\text{m}^2$ ]), *Vmc* = material volume of the core [ $\mu\text{m}^3/\mu\text{m}^2$ ], *Vmp* =  
 49 material volume of peaks ( $p = 10\%$ , [ $\mu\text{m}^3/\mu\text{m}^2$ ]), *Vv* = void volume at a given height ( $p = 10\%$ , [ $\mu\text{m}^3/\mu\text{m}^2$ ]), *Vvc* = void volume of the core ( $p = 10\%$ ,  $q = 80\%$  [ $\mu\text{m}^3/\mu\text{m}^2$ ]), *Vvv*  
 50 = void volume of the valley ( $p = 80\%$  [ $\mu\text{m}^3/\mu\text{m}^2$ ]).

51

| Pa          | Primary surface (A) |       |       |       |       |       |       |       | S-F surface (B) |       |       |       |       |       |       |       | S-L surface (C) |       |       |       |       |       |       |       |
|-------------|---------------------|-------|-------|-------|-------|-------|-------|-------|-----------------|-------|-------|-------|-------|-------|-------|-------|-----------------|-------|-------|-------|-------|-------|-------|-------|
|             | G                   |       | GO    |       | L     |       | LO    |       | G               |       | GO    |       | L     |       | LO    |       | G               |       | GO    |       | L     |       | LO    |       |
|             | M                   | SD    | M     | SD    | M     | SD    | M     | SD    | M               | SD    | M     | SD    | M     | SD    | M     | SD    | M               | SD    | M     | SD    | M     | SD    | M     | SD    |
| <i>SIOz</i> | 12.36               | 2.60  | 16.98 | 3.38  | 14.20 | 6.67  | 16.88 | 5.64  | 12.53           | 2.72  | 18.29 | 4.87  | 13.61 | 6.59  | 16.91 | 5.57  | 12.26           | 2.53  | 17.11 | 3.38  | 14.39 | 6.67  | 16.82 | 5.49  |
| <i>S5p</i>  | 10.07               | 2.09  | 14.27 | 2.87  | 11.38 | 5.78  | 13.78 | 4.83  | 10.23           | 2.33  | 15.35 | 4.25  | 10.98 | 5.77  | 13.79 | 4.80  | 10.16           | 2.13  | 14.34 | 2.95  | 11.55 | 5.69  | 13.77 | 4.81  |
| <i>S5v</i>  | 2.29                | 0.55  | 2.72  | 0.53  | 2.81  | 1.00  | 3.10  | 0.98  | 2.29            | 0.53  | 2.94  | 0.65  | 2.63  | 0.89  | 3.12  | 0.95  | 2.10            | 0.43  | 2.77  | 0.48  | 2.84  | 1.09  | 3.05  | 0.82  |
| <i>Sa</i>   | 0.90                | 0.20  | 0.87  | 0.25  | 1.09  | 0.37  | 1.06  | 0.20  | 0.54            | 0.15  | 0.59  | 0.17  | 0.56  | 0.13  | 0.59  | 0.13  | 0.35            | 0.10  | 0.40  | 0.05  | 0.42  | 0.09  | 0.46  | 0.09  |
| <i>Sal</i>  | 25.84               | 3.61  | 24.03 | 5.16  | 27.25 | 2.82  | 25.59 | 4.08  | 11.96           | 4.26  | 10.17 | 2.58  | 11.35 | 1.45  | 10.33 | 0.94  | 5.13            | 0.75  | 4.11  | 0.83  | 5.42  | 1.39  | 5.05  | 1.51  |
| <i>Sda</i>  | 3.85                | 2.13  | 2.03  | 1.29  | 1.38  | 0.83  | 2.15  | 0.76  | 2.27            | 1.59  | 2.43  | 0.73  | 1.35  | 0.77  | 1.82  | 0.73  | 2.16            | 1.03  | 1.46  | 0.84  | 1.43  | 0.59  | 1.40  | 0.46  |
| <i>Sdq</i>  | 0.91                | 0.28  | 1.37  | 0.25  | 1.05  | 0.48  | 1.33  | 0.65  | 1.01            | 0.37  | 1.53  | 0.61  | 0.98  | 0.45  | 1.33  | 0.65  | 0.91            | 0.28  | 1.37  | 0.25  | 1.06  | 0.48  | 1.33  | 0.65  |
| <i>Sdr</i>  | 31.63               | 16.91 | 65.33 | 23.12 | 46.39 | 36.27 | 71.39 | 66.95 | 39.06           | 24.94 | 88.23 | 75.71 | 40.64 | 34.55 | 71.30 | 66.97 | 31.59           | 16.72 | 65.45 | 23.18 | 46.56 | 36.19 | 71.55 | 66.82 |

|            |         |         |         |         |         |         |         |         |         |         |         |         |         |         |         |         |         |         |         |         |         |         |         |         |
|------------|---------|---------|---------|---------|---------|---------|---------|---------|---------|---------|---------|---------|---------|---------|---------|---------|---------|---------|---------|---------|---------|---------|---------|---------|
| <i>Sdv</i> | 8.2E-08 | 3.8E-08 | 4.2E-08 | 2.6E-08 | 2.2E-08 | 1.6E-08 | 6.2E-08 | 5.9E-08 | 5.1E-08 | 1.8E-08 | 7.0E-08 | 3.8E-08 | 3.6E-08 | 2.5E-08 | 5.6E-08 | 3.6E-08 | 4.3E-08 | 1.6E-08 | 4.1E-08 | 2.5E-08 | 3.9E-08 | 1.1E-08 | 4.5E-08 | 1.7E-08 |
| <i>Sha</i> | 1.76    | 1.29    | 1.10    | 0.51    | 1.66    | 0.47    | 1.68    | 1.04    | 1.54    | 1.19    | 1.10    | 0.49    | 1.61    | 0.42    | 1.58    | 1.10    | 1.09    | 0.91    | 0.73    | 0.42    | 1.07    | 0.41    | 1.15    | 1.00    |
| <i>Shv</i> | 3.4E-08 | 2.4E-08 | 2.4E-08 | 1.0E-08 | 3.8E-08 | 2.5E-08 | 5.1E-08 | 5.8E-08 | 2.8E-08 | 1.8E-08 | 2.9E-08 | 1.2E-08 | 4.3E-08 | 1.9E-08 | 3.9E-08 | 2.5E-08 | 2.0E-08 | 1.3E-08 | 1.7E-08 | 1.2E-08 | 2.3E-08 | 6.9E-09 | 2.7E-08 | 2.0E-08 |
| <i>Skv</i> | 15.26   | 16.21   | 16.27   | 12.47   | 6.78    | 6.10    | 9.62    | 5.97    | 44.05   | 46.07   | 45.74   | 23.84   | 26.16   | 23.52   | 32.59   | 15.62   | 60.52   | 43.10   | 93.94   | 39.10   | 49.16   | 47.01   | 54.93   | 27.25   |
| <i>Smc</i> | 1.24    | 0.29    | 1.25    | 0.36    | 1.49    | 0.43    | 1.46    | 0.30    | 0.79    | 0.25    | 0.87    | 0.27    | 0.79    | 0.17    | 0.84    | 0.18    | 0.53    | 0.17    | 0.56    | 0.07    | 0.62    | 0.14    | 0.66    | 0.13    |
| <i>Smr</i> | 0.00    | 0.00    | 0.00    | 0.01    | 0.00    | 0.00    | 0.00    | 0.00    | 0.00    | 0.00    | 0.00    | 0.00    | 0.00    | 0.01    | 0.00    | 0.00    | 0.00    | 0.00    | 0.00    | 0.00    | 0.00    | 0.00    | 0.00    | 0.00    |
| <i>Sp</i>  | 12.60   | 2.08    | 17.38   | 4.17    | 14.16   | 6.52    | 17.24   | 5.58    | 14.06   | 2.76    | 19.76   | 4.90    | 14.98   | 7.08    | 18.85   | 6.24    | 13.08   | 2.30    | 18.87   | 3.41    | 16.20   | 6.67    | 18.95   | 6.00    |
| <i>Spc</i> | 36.48   | 8.19    | 48.88   | 8.73    | 42.23   | 18.54   | 50.33   | 15.62   | 37.30   | 8.43    | 50.84   | 10.61   | 40.13   | 19.44   | 49.40   | 15.80   | 35.45   | 8.07    | 48.34   | 9.01    | 42.39   | 18.14   | 49.47   | 15.86   |
| <i>Spd</i> | 0.01    | 0.00    | 0.01    | 0.00    | 0.01    | 0.00    | 0.01    | 0.01    | 0.01    | 0.01    | 0.01    | 0.00    | 0.01    | 0.00    | 0.01    | 0.01    | 0.01    | 0.00    | 0.01    | 0.00    | 0.01    | 0.00    | 0.01    | 0.01    |
| <i>Sq</i>  | 1.17    | 0.25    | 1.16    | 0.26    | 1.37    | 0.46    | 1.39    | 0.25    | 0.76    | 0.17    | 0.91    | 0.31    | 0.79    | 0.19    | 0.87    | 0.24    | 0.52    | 0.14    | 0.65    | 0.11    | 0.61    | 0.14    | 0.71    | 0.19    |
| <i>Ssk</i> | -0.14   | 0.84    | 0.32    | 0.84    | -0.54   | 0.52    | -0.64   | 0.87    | 1.55    | 1.96    | 2.14    | 1.29    | 0.65    | 1.56    | 1.06    | 1.62    | 2.66    | 1.52    | 4.69    | 1.36    | 1.91    | 2.30    | 2.60    | 2.05    |
| <i>Std</i> | 55.89   | 26.84   | 66.29   | 22.72   | 73.94   | 35.91   | 86.69   | 33.17   | 66.22   | 28.89   | 60.99   | 27.32   | 80.36   | 33.83   | 86.69   | 33.17   | 60.55   | 26.21   | 66.29   | 22.72   | 73.94   | 35.91   | 85.53   | 34.95   |
| <i>Str</i> | 0.33    | 0.06    | 0.37    | 0.08    | 0.37    | 0.08    | 0.40    | 0.13    | 0.56    | 0.13    | 0.57    | 0.17    | 0.55    | 0.14    | 0.66    | 0.14    | 0.67    | 0.08    | 0.70    | 0.10    | 0.64    | 0.11    | 0.67    | 0.06    |
| <i>Sv</i>  | 5.95    | 2.33    | 6.56    | 0.93    | 7.40    | 2.37    | 8.32    | 2.23    | 4.35    | 1.39    | 6.35    | 2.90    | 5.39    | 1.73    | 6.05    | 2.21    | 4.31    | 1.78    | 4.85    | 1.09    | 6.36    | 2.04    | 6.49    | 2.08    |
| <i>Sxp</i> | 2.83    | 0.93    | 2.62    | 0.71    | 3.45    | 1.51    | 3.46    | 0.57    | 1.56    | 0.38    | 1.67    | 0.35    | 1.81    | 0.40    | 1.90    | 0.36    | 0.99    | 0.26    | 1.16    | 0.11    | 1.23    | 0.27    | 1.35    | 0.25    |
| <i>Sz</i>  | 18.54   | 3.65    | 23.94   | 4.30    | 21.56   | 8.50    | 25.57   | 7.44    | 18.40   | 3.39    | 26.11   | 7.54    | 20.37   | 8.69    | 24.90   | 8.11    | 17.39   | 3.77    | 23.71   | 4.44    | 22.57   | 7.59    | 25.44   | 7.98    |
| <i>Vm</i>  | 0.04    | 0.02    | 0.04    | 0.02    | 0.03    | 0.01    | 0.04    | 0.02    | 0.04    | 0.01    | 0.06    | 0.03    | 0.04    | 0.02    | 0.04    | 0.03    | 0.03    | 0.01    | 0.05    | 0.02    | 0.04    | 0.01    | 0.05    | 0.02    |
| <i>Vmc</i> | 1.01    | 0.26    | 0.99    | 0.33    | 1.27    | 0.45    | 1.20    | 0.25    | 0.57    | 0.18    | 0.59    | 0.14    | 0.58    | 0.16    | 0.62    | 0.12    | 0.36    | 0.12    | 0.39    | 0.05    | 0.43    | 0.11    | 0.46    | 0.09    |
| <i>Vmp</i> | 0.04    | 0.02    | 0.04    | 0.02    | 0.03    | 0.01    | 0.04    | 0.02    | 0.04    | 0.01    | 0.06    | 0.03    | 0.04    | 0.02    | 0.04    | 0.03    | 0.03    | 0.01    | 0.05    | 0.02    | 0.04    | 0.01    | 0.05    | 0.02    |
| <i>Vv</i>  | 1.27    | 0.28    | 1.29    | 0.35    | 1.52    | 0.42    | 1.50    | 0.31    | 0.83    | 0.25    | 0.93    | 0.30    | 0.84    | 0.19    | 0.89    | 0.20    | 0.56    | 0.17    | 0.61    | 0.08    | 0.66    | 0.14    | 0.70    | 0.14    |
| <i>Vvc</i> | 1.10    | 0.25    | 1.13    | 0.33    | 1.32    | 0.35    | 1.28    | 0.30    | 0.73    | 0.24    | 0.81    | 0.26    | 0.72    | 0.17    | 0.76    | 0.18    | 0.49    | 0.16    | 0.53    | 0.08    | 0.58    | 0.13    | 0.61    | 0.13    |
| <i>Vvv</i> | 0.17    | 0.06    | 0.16    | 0.03    | 0.20    | 0.08    | 0.22    | 0.04    | 0.10    | 0.02    | 0.12    | 0.03    | 0.12    | 0.02    | 0.12    | 0.03    | 0.06    | 0.02    | 0.08    | 0.01    | 0.08    | 0.02    | 0.09    | 0.02    |
| <i>n</i>   | 7       |         | 7       |         | 7       |         | 8       |         | 7       |         | 7       |         | 7       |         | 8       |         | 7       |         | 7       |         | 7       |         | 8       |         |

52

53

54

55 **Table S4. Statistics from WY-tests for the 3D texture parameters.**  
56 Test statistics from WY-tests with 15% trimming for the 3D texture analyses of the primary surface (A), S-F  
57 surface (B), and S-L surface (C). Values in bold indicate a significant difference ( $p \leq 0.05$ ). *Ft* = test statistics,  
58 *nu1* and *nu2* = 1<sup>st</sup> and 2<sup>nd</sup> degree of freedom, respectively, *p* = significance level. For key to parameter lettering  
59 see App. 2.

| Parameter   | (A)       |              |            |            | (B)       |              |            |            | (C)       |              |            |            |
|-------------|-----------|--------------|------------|------------|-----------|--------------|------------|------------|-----------|--------------|------------|------------|
|             | <i>Ft</i> | <i>p</i>     | <i>nu1</i> | <i>nu2</i> | <i>Ft</i> | <i>p</i>     | <i>nu1</i> | <i>nu2</i> | <i>Ft</i> | <i>p</i>     | <i>nu1</i> | <i>nu2</i> |
| <i>S10z</i> | 3.040     | 0.086        | 3          | 8.835      | 2.782     | 0.103        | 3          | 8.852      | 3.310     | 0.073        | 3          | 8.772      |
| <i>S5p</i>  | 3.145     | 0.081        | 3          | 8.739      | 2.538     | 0.122        | 3          | 8.998      | 2.861     | 0.099        | 3          | 8.725      |
| <i>S5v</i>  | 1.544     | 0.269        | 3          | 9.089      | 1.837     | 0.209        | 3          | 9.271      | 5.474     | <b>0.021</b> | 3          | 8.868      |
| <i>Sa</i>   | 2.411     | 0.135        | 3          | 8.920      | 0.177     | 0.910        | 3          | 9.324      | 0.865     | 0.495        | 3          | 8.799      |
| <i>Sal</i>  | 0.942     | 0.459        | 3          | 9.215      | 0.806     | 0.525        | 3          | 8.148      | 4.445     | <b>0.035</b> | 3          | 9.043      |
| <i>Sda</i>  | 4.359     | <b>0.037</b> | 3          | 8.971      | 2.332     | 0.141        | 3          | 9.175      | 0.537     | 0.669        | 3          | 8.704      |
| <i>Sdq</i>  | 1.863     | 0.204        | 3          | 9.259      | 1.515     | 0.274        | 3          | 9.324      | 1.853     | 0.206        | 3          | 9.261      |
| <i>Sdr</i>  | 1.868     | 0.205        | 3          | 9.064      | 1.344     | 0.318        | 3          | 9.409      | 1.865     | 0.205        | 3          | 9.053      |
| <i>Sha</i>  | 1.114     | 0.393        | 3          | 9.028      | 1.342     | 0.322        | 3          | 8.760      | 0.670     | 0.591        | 3          | 9.083      |
| <i>Sku</i>  | 2.606     | 0.129        | 3          | 7.438      | 0.744     | 0.553        | 3          | 8.722      | 3.181     | 0.081        | 3          | 8.533      |
| <i>Smc</i>  | 2.047     | 0.179        | 3          | 8.884      | 0.110     | 0.952        | 3          | 9.303      | 0.803     | 0.525        | 3          | 8.508      |
| <i>Smr</i>  | 0.655     | 0.601        | 3          | 8.266      | 0.659     | 0.598        | 3          | 8.777      | 2.426     | 0.137        | 3          | 8.425      |
| <i>Sp</i>   | 3.536     | 0.071        | 3          | 7.618      | 3.449     | 0.072        | 3          | 7.990      | 4.192     | <b>0.043</b> | 3          | 8.629      |
| <i>Spc</i>  | 2.731     | 0.110        | 3          | 8.490      | 2.065     | 0.178        | 3          | 8.657      | 2.896     | 0.097        | 3          | 8.671      |
| <i>Spd</i>  | 1.124     | 0.389        | 3          | 9.159      | 1.639     | 0.250        | 3          | 8.739      | 1.358     | 0.318        | 3          | 8.718      |
| <i>Sq</i>   | 2.004     | 0.187        | 3          | 8.626      | 0.154     | 0.925        | 3          | 9.321      | 0.878     | 0.488        | 3          | 9.010      |
| <i>Ssk</i>  | 2.866     | 0.106        | 3          | 7.787      | 0.788     | 0.529        | 3          | 9.264      | 4.498     | <b>0.034</b> | 3          | 9.169      |
| <i>Std</i>  | 1.040     | 0.421        | 3          | 9.063      | 0.625     | 0.617        | 3          | 8.985      | 0.708     | 0.575        | 3          | 7.566      |
| <i>Str</i>  | 0.558     | 0.657        | 3          | 8.542      | 1.629     | 0.251        | 3          | 8.900      | 0.329     | 0.805        | 3          | 8.736      |
| <i>Sv</i>   | 1.084     | 0.409        | 3          | 8.029      | 1.067     | 0.409        | 3          | 9.360      | 3.862     | <b>0.048</b> | 3          | 9.424      |
| <i>Sxp</i>  | 2.297     | 0.145        | 3          | 9.166      | 1.101     | 0.398        | 3          | 9.049      | 1.793     | 0.222        | 3          | 8.575      |
| <i>Sz</i>   | 2.284     | 0.149        | 3          | 8.784      | 2.972     | <b>0.095</b> | 3          | 8.213      | 4.282     | <b>0.042</b> | 3          | 8.432      |
| <i>Vm</i>   | 2.093     | 0.172        | 3          | 8.859      | 0.251     | 0.858        | 3          | 8.988      | 1.178     | 0.371        | 3          | 9.092      |
| <i>Vmc</i>  | 2.199     | 0.158        | 3          | 8.956      | 0.209     | 0.887        | 3          | 9.059      | 1.347     | 0.325        | 3          | 8.168      |
| <i>Vmp</i>  | 2.093     | 0.172        | 3          | 8.859      | 0.251     | 0.858        | 3          | 8.988      | 1.178     | 0.371        | 3          | 9.092      |
| <i>Vv</i>   | 1.950     | 0.193        | 3          | 8.898      | 0.089     | 0.964        | 3          | 9.324      | 0.758     | 0.547        | 3          | 8.564      |
| <i>Vvc</i>  | 1.779     | 0.221        | 3          | 8.926      | 0.049     | 0.985        | 3          | 9.248      | 0.673     | 0.591        | 3          | 8.434      |
| <i>Vvv</i>  | 2.834     | 0.098        | 3          | 9.112      | 1.444     | 0.293        | 3          | 9.149      | 2.487     | 0.128        | 3          | 8.869      |
| <i>Sdv</i>  | 5.971     | <b>0.016</b> | 3          | 9.128      | 0.762     | 0.545        | 3          | 8.525      | 0.162     | 0.920        | 3          | 9.104      |
| <i>Shv</i>  | 0.795     | 0.529        | 3          | 8.384      | 1.139     | 0.382        | 3          | 9.437      | 1.209     | 0.366        | 3          | 8.248      |

60

61

62  
63  
64  
65  
66  
67  
68  
69  
70  
71

**Table S5. Statistics from pair-wise comparison for the microwear and 3D texture parameters.**

Test statistics from heteroscedastic pair-wise comparison test (analog to Dunnett’s T3 test) with 15% trimming for the microwear/SC = silica (a) and 3D texture (b) parameters of the primary surface (A), S-F surface (B), and S-L surface (C) grouped by the feeding groups (G = grass meal, GO = grass meal with crushed oats, LO = lucerne with crushed oats, and L = lucerne). Values in bold indicate a significant difference ( $p \leq 0.05$ ). t = test statistics, df = degree of freedom,  $p$  = significance level. For key to parameter lettering see Apps. 1 and 2.

a)

| Parameter   | Group 1 | Group2 | t      | df    | p                |
|-------------|---------|--------|--------|-------|------------------|
| <i>Ls</i>   | GO      | G      | 2.612  | 8.49  | <b>0.030</b>     |
|             | GO      | LO     | 3.785  | 5.16  | <b>0.012</b>     |
|             | GO      | L      | 3.397  | 8.82  | <b>0.008</b>     |
|             | G       | LO     | 1.997  | 6.38  | 0.090            |
|             | G       | L      | 0.495  | 9.88  | 0.631            |
|             | LO      | L      | 1.714  | 5.94  | 0.138            |
| <i>Np</i>   | GO      | G      | 2.753  | 7.25  | <b>0.027</b>     |
|             | GO      | LO     | 4.289  | 4.85  | <b>0.008</b>     |
|             | GO      | L      | 3.476  | 6.41  | <b>0.012</b>     |
|             | G       | LO     | 2.095  | 7.10  | 0.074            |
|             | G       | L      | 1.077  | 9.38  | 0.308            |
|             | LO      | L      | 1.027  | 8.37  | 0.333            |
| <i>Np10</i> | GO      | G      | 2.760  | 6.51  | <b>0.030</b>     |
|             | GO      | LO     | 0.505  | 7.93  | 0.628            |
|             | GO      | L      | 2.138  | 5.88  | 0.077            |
|             | G       | LO     | 3.047  | 6.27  | <b>0.021</b>     |
|             | G       | L      | 0.000  | 9.28  | 1.000            |
|             | LO      | L      | 2.350  | 5.73  | 0.059            |
| <i>Np5</i>  | GO      | G      | 1.992  | 7.41  | 0.084            |
|             | GO      | LO     | 0.558  | 4.65  | 0.603            |
|             | GO      | L      | 1.517  | 6.52  | 0.176            |
|             | G       | LO     | 0.571  | 6.31  | 0.588            |
|             | G       | L      | 0.072  | 9.37  | 0.944            |
|             | LO      | L      | 0.478  | 7.55  | 0.646            |
| <i>Ns</i>   | GO      | G      | 1.548  | 5.38  | 0.178            |
|             | GO      | LO     | 2.044  | 5.86  | 0.088            |
|             | GO      | L      | 1.983  | 7.39  | 0.086            |
|             | G       | LO     | 0.933  | 8.31  | 0.377            |
|             | G       | L      | 0.910  | 8.20  | 0.389            |
|             | LO      | L      | 0.152  | 8.62  | 0.883            |
| <i>SC</i>   | GO      | G      | 3.892  | 46.13 | <b>&lt;0.001</b> |
|             | GO      | LO     | 19.944 | 29.28 | <b>&lt;0.001</b> |
|             | GO      | L      | 18.010 | 33.08 | <b>&lt;0.001</b> |
|             | G       | LO     | 27.988 | 40.25 | <b>&lt;0.001</b> |
|             | G       | L      | 23.206 | 56.05 | <b>&lt;0.001</b> |
|             | LO      | L      | 4.985  | 44.34 | <b>&lt;0.001</b> |

72  
73

b)

|             | (A) |    |       |      |       | (B)   |      |       | (C)   |      |       |
|-------------|-----|----|-------|------|-------|-------|------|-------|-------|------|-------|
|             | t   | df | p     | t    | df    | p     | t    | df    | p     |      |       |
| <i>S10z</i> | GO  | G  | 3.068 | 7.14 | 0.018 | 2.914 | 6.94 | 0.023 | 3.182 | 6.88 | 0.016 |
|             | GO  | LO | 0.503 | 4.71 | 0.638 | 0.185 | 4.86 | 0.860 | 0.614 | 4.67 | 0.568 |
|             | GO  | L  | 1.611 | 6.23 | 0.157 | 1.537 | 6.43 | 0.172 | 1.704 | 6.20 | 0.138 |

|            |    |    |       |      |              |       |      |       |       |      |              |
|------------|----|----|-------|------|--------------|-------|------|-------|-------|------|--------------|
|            | G  | LO | 0.990 | 5.42 | 0.364        | 1.384 | 5.87 | 0.217 | 0.962 | 5.53 | 0.376        |
|            | G  | L  | 0.186 | 7.35 | 0.858        | 0.342 | 7.86 | 0.741 | 0.218 | 7.54 | 0.833        |
|            | LO | L  | 0.693 | 8.29 | 0.507        | 0.920 | 8.38 | 0.383 | 0.655 | 8.24 | 0.530        |
| <i>S5p</i> | GO | G  | 3.121 | 6.82 | 0.017        | 2.798 | 7.40 | 0.025 | 2.963 | 6.65 | 0.022        |
|            | GO | LO | 0.379 | 4.60 | 0.722        | 0.106 | 5.03 | 0.920 | 0.406 | 4.65 | 0.702        |
|            | GO | L  | 1.594 | 6.18 | 0.161        | 1.450 | 6.92 | 0.191 | 1.563 | 6.26 | 0.167        |
|            | G  | LO | 1.102 | 5.43 | 0.317        | 1.419 | 5.77 | 0.208 | 1.084 | 5.65 | 0.322        |
|            | G  | L  | 0.290 | 7.57 | 0.780        | 0.461 | 8.03 | 0.657 | 0.326 | 7.87 | 0.753        |
|            | LO | L  | 0.737 | 8.03 | 0.482        | 0.901 | 8.05 | 0.394 | 0.702 | 8.07 | 0.502        |
| <i>S5v</i> | GO | G  | 1.938 | 7.95 | 0.089        | 2.051 | 7.70 | 0.076 | 3.601 | 7.43 | <b>0.008</b> |
|            | GO | LO | 1.050 | 5.42 | 0.338        | 0.770 | 6.57 | 0.468 | 1.577 | 4.54 | 0.181        |
|            | GO | L  | 1.748 | 7.24 | 0.123        | 1.950 | 7.08 | 0.092 | 2.994 | 6.47 | <b>0.022</b> |
|            | G  | LO | 0.012 | 5.22 | 0.991        | 0.849 | 7.35 | 0.423 | 0.071 | 4.94 | 0.946        |
|            | G  | L  | 0.578 | 6.96 | 0.581        | 0.532 | 7.84 | 0.609 | 0.765 | 7.41 | 0.468        |
|            | LO | L  | 0.405 | 8.41 | 0.695        | 1.137 | 8.87 | 0.285 | 0.413 | 7.16 | 0.692        |
| <i>Sa</i>  | GO | G  | 1.107 | 6.31 | 0.309        | 0.232 | 7.46 | 0.823 | 0.662 | 5.48 | 0.535        |
|            | GO | LO | 0.740 | 7.27 | 0.483        | 0.222 | 7.76 | 0.830 | 0.774 | 7.99 | 0.461        |
|            | GO | L  | 1.183 | 8.84 | 0.267        | 0.720 | 8.42 | 0.491 | 1.479 | 6.29 | 0.187        |
|            | G  | LO | 1.693 | 5.29 | 0.148        | 0.001 | 7.93 | 0.999 | 0.349 | 5.38 | 0.740        |
|            | G  | L  | 2.591 | 7.80 | 0.033        | 0.573 | 9.00 | 0.580 | 1.375 | 8.90 | 0.203        |
|            | LO | L  | 0.230 | 7.48 | 0.825        | 0.550 | 8.94 | 0.596 | 0.485 | 6.14 | 0.645        |
| <i>Sal</i> | GO | G  | 0.356 | 7.65 | 0.732        | 0.344 | 6.93 | 0.741 | 3.389 | 7.93 | <b>0.010</b> |
|            | GO | LO | 1.028 | 6.41 | 0.341        | 0.237 | 4.98 | 0.822 | 0.792 | 4.93 | 0.465        |
|            | GO | L  | 0.017 | 9.00 | 0.987        | 0.424 | 4.40 | 0.692 | 0.267 | 6.98 | 0.797        |
|            | G  | LO | 1.658 | 7.26 | 0.140        | 0.887 | 6.12 | 0.409 | 2.401 | 5.11 | 0.060        |
|            | G  | L  | 0.349 | 8.61 | 0.736        | 0.031 | 4.92 | 0.976 | 2.343 | 7.31 | <b>0.050</b> |
|            | LO | L  | 0.917 | 7.35 | 0.388        | 1.639 | 6.95 | 0.146 | 0.498 | 7.73 | 0.632        |
| <i>Sda</i> | GO | G  | 2.362 | 6.81 | <b>0.051</b> | 1.449 | 6.71 | 0.192 | 0.877 | 7.92 | 0.406        |
|            | GO | LO | 3.561 | 7.59 | <b>0.008</b> | 1.656 | 8.00 | 0.136 | 1.164 | 7.45 | 0.280        |
|            | GO | L  | 2.771 | 8.33 | <b>0.023</b> | 0.087 | 8.82 | 0.932 | 1.324 | 6.12 | 0.233        |
|            | G  | LO | 0.677 | 7.67 | 0.518        | 2.689 | 6.74 | 0.032 | 0.115 | 7.08 | 0.911        |
|            | G  | L  | 0.428 | 6.24 | 0.683        | 1.397 | 6.74 | 0.207 | 0.154 | 5.77 | 0.883        |
|            | LO | L  | 1.396 | 7.19 | 0.204        | 1.769 | 8.80 | 0.112 | 0.037 | 7.39 | 0.971        |
| <i>Sdq</i> | GO | G  | 2.454 | 8.00 | 0.040        | 1.836 | 7.67 | 0.105 | 2.448 | 8.00 | 0.040        |
|            | GO | LO | 0.426 | 6.34 | 0.684        | 0.244 | 7.73 | 0.814 | 0.434 | 6.35 | 0.679        |
|            | GO | L  | 1.253 | 8.36 | 0.244        | 0.874 | 8.92 | 0.405 | 1.256 | 8.34 | 0.243        |
|            | G  | LO | 1.286 | 6.31 | 0.244        | 1.886 | 6.99 | 0.101 | 1.279 | 6.34 | 0.246        |
|            | G  | L  | 0.664 | 8.33 | 0.525        | 0.665 | 8.33 | 0.524 | 0.653 | 8.33 | 0.531        |
|            | LO | L  | 0.605 | 8.39 | 0.561        | 1.025 | 8.92 | 0.332 | 0.604 | 8.43 | 0.562        |
| <i>Sdr</i> | GO | G  | 2.377 | 6.73 | 0.051        | 1.770 | 7.74 | 0.116 | 2.371 | 6.69 | 0.051        |
|            | GO | LO | 0.639 | 5.89 | 0.547        | 0.176 | 7.83 | 0.865 | 0.648 | 5.88 | 0.542        |
|            | GO | L  | 1.413 | 7.18 | 0.200        | 1.002 | 8.36 | 0.344 | 1.415 | 7.14 | 0.199        |
|            | G  | LO | 1.192 | 7.63 | 0.269        | 1.818 | 7.99 | 0.107 | 1.184 | 7.65 | 0.272        |
|            | G  | L  | 0.490 | 8.85 | 0.636        | 0.499 | 8.90 | 0.630 | 0.478 | 8.85 | 0.644        |
|            | LO | L  | 0.624 | 8.93 | 0.548        | 1.095 | 8.82 | 0.302 | 0.623 | 8.94 | 0.549        |
| <i>Sdv</i> | GO | G  | 1.991 | 7.75 | 0.083        | 0.965 | 5.62 | 0.374 | 0.225 | 6.29 | 0.829        |
|            | GO | LO | 4.437 | 6.80 | <b>0.003</b> | 1.057 | 6.22 | 0.330 | 0.532 | 7.46 | 0.610        |
|            | GO | L  | 1.822 | 8.99 | 0.102        | 0.341 | 7.89 | 0.742 | 0.130 | 8.94 | 0.899        |
|            | G  | LO | 1.588 | 6.10 | 0.163        | 1.589 | 7.76 | 0.152 | 0.107 | 5.41 | 0.918        |
|            | G  | L  | 0.256 | 8.63 | 0.804        | 1.189 | 4.99 | 0.288 | 0.314 | 6.52 | 0.763        |



|            |    |    |       |      |       |       |      |       |       |      |              |
|------------|----|----|-------|------|-------|-------|------|-------|-------|------|--------------|
|            | LO | L  | 2.036 | 7.87 | 0.077 | 0.895 | 5.41 | 0.409 | 0.669 | 8.71 | 0.521        |
| <i>Sha</i> | GO | G  | 0.879 | 6.42 | 0.411 | 0.506 | 6.30 | 0.630 | 0.504 | 6.60 | 0.631        |
|            | GO | LO | 0.340 | 5.37 | 0.747 | 0.667 | 4.71 | 0.536 | 0.475 | 5.46 | 0.653        |
|            | GO | L  | 0.062 | 5.83 | 0.953 | 0.004 | 6.08 | 0.997 | 0.062 | 6.58 | 0.953        |
|            | G  | LO | 1.935 | 7.29 | 0.093 | 2.003 | 6.09 | 0.091 | 1.483 | 7.24 | 0.180        |
|            | G  | L  | 1.438 | 8.28 | 0.187 | 0.753 | 8.67 | 0.471 | 0.616 | 8.80 | 0.554        |
|            | LO | L  | 0.469 | 8.99 | 0.650 | 1.172 | 7.80 | 0.276 | 0.810 | 8.73 | 0.439        |
| <i>Shv</i> | GO | G  | 0.800 | 6.47 | 0.452 | 0.667 | 7.96 | 0.524 | 0.522 | 7.72 | 0.617        |
|            | GO | LO | 0.257 | 7.74 | 0.804 | 1.895 | 7.96 | 0.095 | 0.950 | 4.70 | 0.388        |
|            | GO | L  | 0.192 | 5.25 | 0.855 | 1.050 | 8.71 | 0.322 | 0.597 | 8.77 | 0.566        |
|            | G  | LO | 0.992 | 5.80 | 0.361 | 1.277 | 8.00 | 0.237 | 1.901 | 5.02 | 0.115        |
|            | G  | L  | 1.599 | 7.26 | 0.152 | 0.521 | 8.48 | 0.616 | 1.192 | 8.99 | 0.264        |
|            | LO | L  | 0.155 | 4.87 | 0.883 | 0.504 | 8.49 | 0.627 | 0.169 | 5.96 | 0.872        |
| <i>Sku</i> | GO | G  | 0.289 | 6.40 | 0.782 | 0.189 | 4.73 | 0.858 | 1.871 | 5.15 | 0.119        |
|            | GO | LO | 1.038 | 4.05 | 0.357 | 0.597 | 5.71 | 0.574 | 0.501 | 7.48 | 0.631        |
|            | GO | L  | 0.367 | 5.11 | 0.729 | 0.225 | 4.63 | 0.831 | 0.038 | 7.33 | 0.971        |
|            | G  | LO | 2.359 | 4.16 | 0.075 | 1.524 | 6.79 | 0.173 | 2.071 | 4.68 | 0.097        |
|            | G  | L  | 1.054 | 7.05 | 0.326 | 1.044 | 8.70 | 0.325 | 2.500 | 7.70 | 0.038        |
|            | LO | L  | 1.706 | 5.46 | 0.144 | 0.774 | 6.64 | 0.466 | 0.590 | 6.10 | 0.577        |
| <i>Smc</i> | GO | G  | 0.776 | 6.11 | 0.467 | 0.218 | 7.85 | 0.833 | 0.447 | 5.25 | 0.673        |
|            | GO | LO | 0.901 | 7.49 | 0.396 | 0.227 | 7.88 | 0.826 | 0.725 | 7.77 | 0.490        |
|            | GO | L  | 1.196 | 8.71 | 0.263 | 0.590 | 8.35 | 0.571 | 1.150 | 4.87 | 0.303        |
|            | G  | LO | 1.674 | 5.30 | 0.152 | 0.011 | 8.00 | 0.991 | 0.500 | 5.72 | 0.636        |
|            | G  | L  | 2.341 | 7.77 | 0.048 | 0.398 | 8.82 | 0.700 | 1.410 | 8.23 | 0.195        |
|            | LO | L  | 0.095 | 7.55 | 0.927 | 0.385 | 8.79 | 0.710 | 0.292 | 5.22 | 0.781        |
| <i>Smr</i> | GO | G  | 0.907 | 5.52 | 0.402 | 1.312 | 5.55 | 0.241 | 0.165 | 4.44 | 0.876        |
|            | GO | LO | 1.295 | 4.30 | 0.260 | 1.416 | 4.58 | 0.221 | 2.862 | 5.78 | 0.030        |
|            | GO | L  | 0.783 | 6.62 | 0.461 | 0.952 | 6.32 | 0.376 | 1.914 | 8.99 | 0.088        |
|            | G  | LO | 0.676 | 5.47 | 0.527 | 0.054 | 6.56 | 0.958 | 0.576 | 4.10 | 0.595        |
|            | G  | L  | 0.113 | 8.76 | 0.913 | 0.497 | 8.93 | 0.631 | 0.479 | 4.52 | 0.654        |
|            | LO | L  | 0.661 | 6.05 | 0.533 | 0.622 | 7.18 | 0.553 | 0.306 | 6.86 | 0.769        |
| <i>Sp</i>  | GO | G  | 2.736 | 4.43 | 0.047 | 2.992 | 5.05 | 0.030 | 3.297 | 6.29 | <b>0.015</b> |
|            | GO | LO | 0.517 | 4.15 | 0.631 | 0.253 | 4.24 | 0.812 | 0.939 | 4.58 | 0.395        |
|            | GO | L  | 2.319 | 5.40 | 0.064 | 2.003 | 5.59 | 0.096 | 2.401 | 6.31 | <b>0.051</b> |
|            | G  | LO | 0.997 | 6.55 | 0.354 | 1.130 | 5.70 | 0.304 | 0.764 | 5.76 | 0.475        |
|            | G  | L  | 0.065 | 9.00 | 0.949 | 0.052 | 8.37 | 0.960 | 0.056 | 8.33 | 0.957        |
|            | LO | L  | 0.910 | 7.36 | 0.392 | 0.983 | 7.52 | 0.356 | 0.724 | 7.66 | 0.491        |
| <i>Spc</i> | GO | G  | 2.641 | 6.00 | 0.039 | 2.413 | 6.37 | 0.050 | 2.774 | 6.41 | 0.030        |
|            | GO | LO | 0.514 | 4.44 | 0.632 | 0.081 | 4.54 | 0.939 | 0.699 | 4.60 | 0.518        |
|            | GO | L  | 1.955 | 6.15 | 0.097 | 1.532 | 6.47 | 0.173 | 1.977 | 6.36 | 0.093        |
|            | G  | LO | 0.747 | 5.58 | 0.485 | 1.076 | 5.59 | 0.326 | 0.723 | 5.72 | 0.498        |
|            | G  | L  | 0.069 | 8.37 | 0.947 | 0.215 | 8.47 | 0.834 | 0.021 | 8.28 | 0.984        |
|            | LO | L  | 0.725 | 7.30 | 0.491 | 0.841 | 7.19 | 0.428 | 0.661 | 7.66 | 0.528        |
| <i>Spd</i> | GO | G  | 0.934 | 7.97 | 0.378 | 0.694 | 7.71 | 0.508 | 0.637 | 7.82 | 0.542        |
|            | GO | LO | 0.791 | 6.91 | 0.455 | 1.018 | 5.06 | 0.355 | 1.125 | 6.22 | 0.302        |
|            | GO | L  | 0.268 | 7.53 | 0.796 | 0.252 | 6.74 | 0.809 | 0.480 | 5.50 | 0.650        |
|            | G  | LO | 1.947 | 7.17 | 0.092 | 2.201 | 5.54 | 0.074 | 2.081 | 6.81 | 0.077        |
|            | G  | L  | 1.368 | 7.86 | 0.209 | 1.169 | 7.69 | 0.277 | 1.415 | 6.00 | 0.207        |
|            | LO | L  | 0.638 | 8.99 | 0.539 | 1.116 | 8.01 | 0.297 | 1.083 | 8.06 | 0.310        |

|            |       |       |      |       |       |      |              |       |      |              |
|------------|-------|-------|------|-------|-------|------|--------------|-------|------|--------------|
| <i>Sq</i>  | GO G  | 0.858 | 5.75 | 0.425 | 0.464 | 6.88 | 0.657        | 1.532 | 6.69 | 0.171        |
|            | GO LO | 0.635 | 7.09 | 0.545 | 0.034 | 7.57 | 0.973        | 0.854 | 7.54 | 0.419        |
|            | GO L  | 1.295 | 9.00 | 0.228 | 0.526 | 8.98 | 0.612        | 1.454 | 8.45 | 0.182        |
|            | G LO  | 1.353 | 4.86 | 0.236 | 0.500 | 7.74 | 0.631        | 0.289 | 5.77 | 0.782        |
|            | G L   | 2.387 | 6.75 | 0.050 | 0.172 | 8.04 | 0.868        | 0.488 | 6.69 | 0.641        |
|            | LO L  | 0.444 | 7.88 | 0.669 | 0.548 | 8.70 | 0.598        | 0.610 | 9.00 | 0.557        |
| <i>Ssk</i> | GO G  | 0.709 | 6.81 | 0.502 | 1.062 | 7.61 | 0.321        | 2.443 | 6.94 | <b>0.045</b> |
|            | GO LO | 1.123 | 4.20 | 0.322 | 0.662 | 7.50 | 0.528        | 0.945 | 7.79 | 0.373        |
|            | GO L  | 0.990 | 6.29 | 0.359 | 0.304 | 8.98 | 0.768        | 0.165 | 8.81 | 0.872        |
|            | G LO  | 2.999 | 4.48 | 0.035 | 1.543 | 7.99 | 0.162        | 3.249 | 6.30 | <b>0.016</b> |
|            | G L   | 2.341 | 8.38 | 0.046 | 1.302 | 8.37 | 0.228        | 2.697 | 8.46 | <b>0.026</b> |
|            | LO L  | 0.015 | 5.82 | 0.989 | 0.381 | 8.23 | 0.713        | 0.808 | 8.22 | 0.442        |
| <i>Std</i> | GO G  | 0.602 | 6.93 | 0.566 | 0.942 | 6.21 | 0.381        | 0.067 | 4.36 | 0.949        |
|            | GO LO | 0.679 | 5.60 | 0.524 | 0.357 | 5.80 | 0.734        | 0.291 | 4.17 | 0.785        |
|            | GO L  | 1.865 | 7.63 | 0.101 | 0.808 | 7.59 | 0.444        | 1.560 | 5.31 | 0.176        |
|            | G LO  | 0.203 | 7.12 | 0.845 | 1.011 | 7.89 | 0.342        | 0.203 | 7.12 | 0.845        |
|            | G L   | 1.171 | 8.96 | 0.272 | 1.411 | 8.90 | 0.192        | 1.171 | 8.96 | 0.272        |
|            | LO L  | 0.783 | 8.26 | 0.455 | 0.317 | 8.56 | 0.759        | 0.783 | 8.26 | 0.455        |
| <i>Str</i> | GO G  | 1.032 | 6.46 | 0.339 | 0.800 | 7.77 | 0.448        | 0.660 | 7.27 | 0.529        |
|            | GO LO | 0.983 | 5.80 | 0.365 | 0.297 | 5.60 | 0.777        | 0.417 | 6.79 | 0.689        |
|            | GO L  | 1.201 | 8.90 | 0.261 | 1.423 | 8.92 | 0.189        | 0.121 | 6.55 | 0.908        |
|            | G LO  | 0.535 | 4.65 | 0.618 | 1.434 | 6.17 | 0.200        | 0.921 | 5.61 | 0.395        |
|            | G L   | 0.057 | 7.67 | 0.956 | 0.746 | 8.95 | 0.475        | 0.729 | 8.13 | 0.486        |
|            | LO L  | 0.617 | 6.45 | 0.558 | 2.116 | 6.88 | 0.073        | 0.547 | 5.09 | 0.607        |
| <i>Sv</i>  | GO G  | 0.301 | 4.59 | 0.777 | 1.560 | 7.94 | 0.158        | 1.415 | 7.99 | 0.195        |
|            | GO LO | 1.010 | 7.87 | 0.343 | 1.010 | 7.48 | 0.344        | 3.144 | 7.86 | <b>0.014</b> |
|            | GO L  | 1.426 | 9.00 | 0.188 | 1.617 | 8.12 | 0.144        | 2.639 | 7.33 | <b>0.032</b> |
|            | G LO  | 1.121 | 4.76 | 0.315 | 0.284 | 7.17 | 0.785        | 1.789 | 7.90 | 0.112        |
|            | G L   | 1.595 | 5.61 | 0.165 | 0.505 | 7.79 | 0.627        | 1.706 | 7.43 | 0.129        |
|            | LO L  | 0.550 | 8.89 | 0.596 | 0.671 | 8.93 | 0.519        | 0.447 | 7.87 | 0.667        |
| <i>Sxp</i> | GO G  | 0.981 | 7.34 | 0.358 | 0.152 | 6.11 | 0.884        | 1.460 | 5.52 | 0.199        |
|            | GO LO | 0.466 | 7.99 | 0.654 | 1.102 | 7.97 | 0.303        | 1.060 | 6.53 | 0.327        |
|            | GO L  | 1.346 | 7.77 | 0.216 | 1.296 | 7.47 | 0.233        | 2.454 | 8.24 | 0.039        |
|            | G LO  | 1.485 | 7.19 | 0.180 | 1.238 | 6.32 | 0.260        | 0.271 | 4.56 | 0.798        |
|            | G L   | 2.768 | 8.92 | 0.022 | 1.599 | 8.78 | 0.145        | 1.690 | 7.53 | 0.132        |
|            | LO L  | 0.787 | 7.58 | 0.455 | 0.059 | 7.76 | 0.954        | 0.596 | 5.90 | 0.573        |
| <i>Sz</i>  | GO G  | 2.225 | 6.60 | 0.064 | 2.868 | 5.53 | <b>0.031</b> | 3.108 | 5.84 | 0.022        |
|            | GO LO | 0.696 | 4.78 | 0.519 | 0.328 | 4.33 | 0.758        | 1.517 | 4.57 | 0.195        |
|            | GO L  | 2.112 | 6.63 | 0.075 | 1.734 | 5.59 | 0.137        | 2.389 | 5.80 | <b>0.056</b> |
|            | G LO  | 0.543 | 5.98 | 0.607 | 1.004 | 5.61 | 0.357        | 0.270 | 6.16 | 0.796        |
|            | G L   | 0.419 | 8.45 | 0.685 | 0.053 | 7.61 | 0.959        | 0.414 | 7.82 | 0.690        |
|            | LO L  | 0.793 | 7.81 | 0.451 | 0.887 | 8.29 | 0.400        | 0.551 | 8.72 | 0.596        |
| <i>Vm</i>  | GO G  | 1.238 | 5.49 | 0.266 | 0.882 | 6.49 | 0.409        | 1.736 | 6.37 | 0.130        |
|            | GO LO | 0.709 | 7.40 | 0.500 | 0.002 | 7.21 | 0.998        | 0.738 | 6.29 | 0.487        |
|            | GO L  | 0.286 | 8.66 | 0.781 | 0.136 | 8.68 | 0.895        | 1.403 | 7.72 | 0.199        |
|            | G LO  | 2.584 | 6.47 | 0.039 | 0.786 | 7.75 | 0.455        | 0.796 | 8.00 | 0.449        |
|            | G L   | 0.599 | 5.99 | 0.571 | 0.804 | 6.29 | 0.451        | 0.258 | 8.91 | 0.802        |
|            | LO L  | 0.877 | 7.56 | 0.408 | 0.107 | 7.13 | 0.917        | 0.535 | 8.88 | 0.606        |
| <i>Vmc</i> | GO G  | 0.985 | 6.62 | 0.359 | 0.089 | 8.00 | 0.932        | 0.403 | 5.16 | 0.703        |

|            |    |    |       |      |       |       |      |       |       |      |       |
|------------|----|----|-------|------|-------|-------|------|-------|-------|------|-------|
|            | GO | LO | 0.751 | 6.70 | 0.478 | 0.040 | 7.99 | 0.969 | 0.696 | 7.94 | 0.506 |
|            | GO | L  | 1.197 | 8.53 | 0.263 | 0.683 | 7.55 | 0.515 | 1.277 | 4.54 | 0.263 |
|            | G  | LO | 1.499 | 5.13 | 0.193 | 0.046 | 7.98 | 0.964 | 0.515 | 5.37 | 0.627 |
|            | G  | L  | 2.562 | 8.49 | 0.032 | 0.587 | 7.62 | 0.574 | 1.912 | 7.23 | 0.096 |
|            | LO | L  | 0.097 | 6.33 | 0.926 | 0.619 | 7.35 | 0.555 | 0.394 | 4.64 | 0.711 |
| <i>Vmp</i> | GO | G  | 1.238 | 5.49 | 0.266 | 0.882 | 6.49 | 0.409 | 1.736 | 6.37 | 0.130 |
|            | GO | LO | 0.709 | 7.40 | 0.500 | 0.002 | 7.21 | 0.998 | 0.738 | 6.29 | 0.487 |
|            | GO | L  | 0.286 | 8.66 | 0.781 | 0.136 | 8.68 | 0.895 | 1.403 | 7.72 | 0.199 |
|            | G  | LO | 2.584 | 6.47 | 0.039 | 0.786 | 7.75 | 0.455 | 0.796 | 8.00 | 0.449 |
|            | G  | L  | 0.599 | 5.99 | 0.571 | 0.804 | 6.29 | 0.451 | 0.258 | 8.91 | 0.802 |
|            | LO | L  | 0.877 | 7.56 | 0.408 | 0.107 | 7.13 | 0.917 | 0.535 | 8.88 | 0.606 |
| <i>Vv</i>  | GO | G  | 0.684 | 6.08 | 0.519 | 0.242 | 7.71 | 0.815 | 0.562 | 5.63 | 0.596 |
|            | GO | LO | 0.912 | 7.62 | 0.390 | 0.180 | 7.79 | 0.862 | 0.756 | 7.82 | 0.472 |
|            | GO | L  | 1.206 | 8.61 | 0.260 | 0.529 | 8.42 | 0.610 | 1.273 | 5.07 | 0.258 |
|            | G  | LO | 1.642 | 5.38 | 0.157 | 0.065 | 7.99 | 0.950 | 0.387 | 6.13 | 0.712 |
|            | G  | L  | 2.290 | 7.86 | 0.052 | 0.324 | 8.96 | 0.753 | 1.252 | 8.06 | 0.246 |
|            | LO | L  | 0.106 | 7.60 | 0.919 | 0.383 | 8.92 | 0.711 | 0.386 | 5.44 | 0.714 |
| <i>Vvc</i> | GO | G  | 0.431 | 6.13 | 0.682 | 0.178 | 7.87 | 0.864 | 0.482 | 5.65 | 0.648 |
|            | GO | LO | 1.095 | 7.64 | 0.307 | 0.001 | 7.86 | 0.999 | 0.717 | 7.59 | 0.495 |
|            | GO | L  | 1.278 | 8.49 | 0.235 | 0.324 | 8.00 | 0.754 | 1.152 | 4.85 | 0.303 |
|            | G  | LO | 1.649 | 5.44 | 0.155 | 0.192 | 8.00 | 0.853 | 0.416 | 6.48 | 0.691 |
|            | G  | L  | 2.128 | 8.05 | 0.066 | 0.149 | 8.56 | 0.885 | 1.196 | 7.46 | 0.268 |
|            | LO | L  | 0.033 | 7.47 | 0.974 | 0.352 | 8.57 | 0.733 | 0.350 | 5.36 | 0.740 |
| <i>Vvv</i> | GO | G  | 1.014 | 6.69 | 0.346 | 0.588 | 6.65 | 0.576 | 2.168 | 6.89 | 0.067 |
|            | GO | LO | 0.369 | 7.80 | 0.722 | 1.627 | 7.97 | 0.142 | 1.269 | 6.01 | 0.251 |
|            | GO | L  | 1.673 | 8.80 | 0.129 | 1.753 | 8.99 | 0.114 | 2.715 | 8.19 | 0.026 |
|            | G  | LO | 1.325 | 6.07 | 0.233 | 1.372 | 6.42 | 0.216 | 0.081 | 4.91 | 0.938 |
|            | G  | L  | 3.071 | 8.26 | 0.015 | 1.521 | 7.73 | 0.168 | 1.450 | 6.63 | 0.193 |
|            | LO | L  | 1.152 | 8.19 | 0.282 | 0.144 | 8.93 | 0.889 | 0.925 | 8.19 | 0.381 |

74

75

76 **Table S6. Statistics from Cliff tests for the microwear and 3D texture parameters.**  
77 Test statistics from Cliff tests of the microwear/silica concentration (a) and 3D texture (b) parameters grouped  
78 by the feeding groups (G = grass meal, GO = grass meal with crushed oats, LO = lucerne with crushed oats, and  
79 L = lucerne). Values in bold indicate a significant difference ( $p \leq pc \leq 0.05$ ) for a given pair of feeding groups,  
80  $ph$  = test statistics,  $pl$  = lower 95% confidence interval of  $ph$ ,  $pu$  = upper 95% confidence interval of  $ph$ ,  $p$  =  
81 significance level (not adjusted for family-wise error),  $pc$  = critical significance level (adjusted for family-wise  
82 error). For key to parameter lettering see Apps. 1 and 2.

83

84 a)

| Parameter   | Group 1   | Group2    | ph    | pl    | pu    | p               | pc            |
|-------------|-----------|-----------|-------|-------|-------|-----------------|---------------|
| <i>Ls</i>   | GO        | G         | 0.119 | 0.024 | 0.429 | 0.018           | 0.0125        |
|             | <b>GO</b> | <b>LO</b> | 0.000 | 0.000 | 0.348 | <b>0.008</b>    | <b>0.0083</b> |
|             | GO        | L         | 0.095 | 0.017 | 0.395 | 0.01            | 0.01          |
|             | G         | LO        | 0.143 | 0.030 | 0.471 | 0.034           | 0.0167        |
|             | G         | L         | 0.361 | 0.115 | 0.711 | 0.48            | 0.05          |
|             | LO        | L         | 0.762 | 0.426 | 0.933 | 0.14            | 0.025         |
| <i>Np</i>   | GO        | G         | 0.845 | 0.509 | 0.966 | 0.045           | 0.0125        |
|             | <b>GO</b> | <b>LO</b> | 0.929 | 0.639 | 0.990 | <b>0.006</b>    | <b>0.01</b>   |
|             | <b>GO</b> | <b>L</b>  | 0.976 | 0.763 | 0.998 | <b>0.0003</b>   | <b>0.0083</b> |
|             | G         | LO        | 0.810 | 0.472 | 0.953 | 0.073           | 0.0167        |
|             | G         | L         | 0.611 | 0.275 | 0.867 | 0.57            | 0.05          |
|             | LO        | L         | 0.357 | 0.122 | 0.689 | 0.44            | 0.025         |
| <i>Np10</i> | GO        | G         | 0.881 | 0.519 | 0.981 | 0.04            | 0.0125        |
|             | GO        | LO        | 0.459 | 0.225 | 0.713 | 0.78            | 0.025         |
|             | GO        | L         | 0.845 | 0.515 | 0.966 | 0.041           | 0.0167        |
|             | G         | LO        | 0.143 | 0.031 | 0.461 | 0.029           | 0.01          |
|             | G         | L         | 0.458 | 0.173 | 0.774 | 0.83            | 0.05          |
|             | LO        | L         | 0.857 | 0.538 | 0.969 | 0.029           | 0.0083        |
| <i>Np5</i>  | GO        | G         | 0.869 | 0.537 | 0.974 | 0.03            | 0.0083        |
|             | GO        | LO        | 0.541 | 0.236 | 0.818 | 0.83            | 0.025         |
|             | GO        | L         | 0.821 | 0.434 | 0.965 | 0.11            | 0.01          |
|             | G         | LO        | 0.369 | 0.123 | 0.709 | 0.5             | 0.0125        |
|             | G         | L         | 0.514 | 0.218 | 0.801 | 0.94            | 0.05          |
|             | LO        | L         | 0.560 | 0.245 | 0.833 | 0.76            | 0.0167        |
| <i>Ns</i>   | GO        | G         | 0.262 | 0.077 | 0.602 | 0.18            | 0.0125        |
|             | GO        | LO        | 0.184 | 0.045 | 0.516 | 0.062           | 0.01          |
|             | GO        | L         | 0.119 | 0.024 | 0.429 | 0.018           | 0.0083        |
|             | G         | LO        | 0.393 | 0.148 | 0.707 | 0.55            | 0.025         |
|             | G         | L         | 0.292 | 0.076 | 0.673 | 0.32            | 0.0167        |
|             | LO        | L         | 0.464 | 0.177 | 0.778 | 0.86            | 0.05          |
| <i>SC</i>   | GO        | G         | 0.212 | 0.119 | 0.348 | < <b>0.0001</b> | <b>0.05</b>   |
|             | GO        | LO        | 0     | 0     | 0.095 | < <b>0.0001</b> | <b>0.025</b>  |
|             | GO        | L         | 0.007 | 0.001 | 0.042 | < <b>0.0001</b> | <b>0.0167</b> |
|             | G         | LO        | 0     | 0     | 0.072 | < <b>0.0001</b> | <b>0.0125</b> |
|             | G         | L         | 0     | 0     | 0.072 | < <b>0.0001</b> | <b>0.01</b>   |

85

86

|  |    |   |       |       |       |         |        |
|--|----|---|-------|-------|-------|---------|--------|
|  | LO | L | 0.777 | 0.658 | 0.863 | <0.0001 | 0.0083 |
|--|----|---|-------|-------|-------|---------|--------|

b)

|             | Groups | (A)  |      |      |             |      | (B)  |      |      |             |      | (C)  |      |      |             |      |
|-------------|--------|------|------|------|-------------|------|------|------|------|-------------|------|------|------|------|-------------|------|
|             |        | ph   | pl   | pu   | p           | pc   | ph   | pl   | pu   | p           | pc   | ph   | pl   | pu   | p           | pc   |
| <i>S10z</i> | GO G   | 0.88 | 0.58 | 0.97 | 0.02        | 0.01 | 0.76 | 0.41 | 0.93 | 0.16        | 0.01 | 0.88 | 0.58 | 0.97 | 0.02        | 0.01 |
|             | GO LO  | 0.55 | 0.23 | 0.84 | 0.80        | 0.03 | 0.59 | 0.27 | 0.85 | 0.63        | 0.03 | 0.57 | 0.24 | 0.85 | 0.73        | 0.03 |
|             | GO L   | 0.75 | 0.44 | 0.92 | 0.12        | 0.01 | 0.79 | 0.46 | 0.94 | 0.09        | 0.01 | 0.75 | 0.44 | 0.92 | 0.13        | 0.01 |
|             | G LO   | 0.39 | 0.14 | 0.71 | 0.53        | 0.02 | 0.47 | 0.19 | 0.77 | 0.87        | 0.05 | 0.37 | 0.13 | 0.69 | 0.46        | 0.02 |
|             | G L    | 0.46 | 0.20 | 0.76 | 0.84        | 0.05 | 0.64 | 0.33 | 0.87 | 0.40        | 0.01 | 0.48 | 0.21 | 0.77 | 0.92        | 0.05 |
|             | LO L   | 0.66 | 0.35 | 0.88 | 0.34        | 0.01 | 0.59 | 0.29 | 0.83 | 0.60        | 0.02 | 0.64 | 0.33 | 0.87 | 0.40        | 0.01 |
| <i>S5p</i>  | GO G   | 0.88 | 0.58 | 0.97 | 0.02        | 0.01 | 0.78 | 0.42 | 0.94 | 0.14        | 0.01 | 0.88 | 0.58 | 0.97 | 0.02        | 0.01 |
|             | GO LO  | 0.53 | 0.22 | 0.82 | 0.88        | 0.03 | 0.59 | 0.27 | 0.85 | 0.63        | 0.01 | 0.53 | 0.22 | 0.82 | 0.88        | 0.05 |
|             | GO L   | 0.70 | 0.39 | 0.89 | 0.23        | 0.01 | 0.75 | 0.42 | 0.92 | 0.14        | 0.01 | 0.70 | 0.39 | 0.89 | 0.23        | 0.01 |
|             | G LO   | 0.39 | 0.14 | 0.71 | 0.55        | 0.02 | 0.49 | 0.20 | 0.78 | 0.96        | 0.05 | 0.39 | 0.14 | 0.71 | 0.53        | 0.02 |
|             | G L    | 0.48 | 0.21 | 0.77 | 0.92        | 0.05 | 0.55 | 0.26 | 0.81 | 0.76        | 0.03 | 0.46 | 0.20 | 0.76 | 0.84        | 0.03 |
|             | LO L   | 0.66 | 0.35 | 0.88 | 0.34        | 0.01 | 0.57 | 0.27 | 0.82 | 0.68        | 0.02 | 0.64 | 0.33 | 0.87 | 0.40        | 0.01 |
| <i>S5v</i>  | GO G   | 0.73 | 0.40 | 0.92 | 0.19        | 0.01 | 0.57 | 0.26 | 0.84 | 0.70        | 0.05 | 0.86 | 0.56 | 0.97 | 0.02        | 0.01 |
|             | GO LO  | 0.65 | 0.33 | 0.88 | 0.39        | 0.01 | 0.61 | 0.30 | 0.85 | 0.52        | 0.02 | 0.73 | 0.39 | 0.92 | 0.19        | 0.01 |
|             | GO L   | 0.77 | 0.45 | 0.93 | 0.11        | 0.01 | 0.77 | 0.46 | 0.93 | 0.09        | 0.01 | 0.84 | 0.53 | 0.96 | 0.04        | 0.01 |
|             | G LO   | 0.51 | 0.22 | 0.79 | 0.96        | 0.05 | 0.57 | 0.27 | 0.83 | 0.69        | 0.03 | 0.51 | 0.22 | 0.80 | 0.96        | 0.05 |
|             | G L    | 0.57 | 0.28 | 0.82 | 0.67        | 0.02 | 0.73 | 0.42 | 0.91 | 0.15        | 0.01 | 0.59 | 0.29 | 0.83 | 0.60        | 0.02 |
|             | LO L   | 0.57 | 0.28 | 0.82 | 0.68        | 0.03 | 0.66 | 0.34 | 0.88 | 0.35        | 0.01 | 0.55 | 0.26 | 0.82 | 0.76        | 0.03 |
| <i>Sa</i>   | GO G   | 0.39 | 0.14 | 0.71 | 0.55        | 0.02 | 0.45 | 0.18 | 0.75 | 0.78        | 0.05 | 0.59 | 0.28 | 0.84 | 0.60        | 0.02 |
|             | GO LO  | 0.59 | 0.28 | 0.84 | 0.60        | 0.03 | 0.67 | 0.36 | 0.88 | 0.31        | 0.02 | 0.69 | 0.37 | 0.90 | 0.26        | 0.01 |
|             | GO L   | 0.71 | 0.40 | 0.90 | 0.19        | 0.01 | 0.79 | 0.47 | 0.94 | 0.08        | 0.01 | 0.79 | 0.48 | 0.94 | 0.07        | 0.01 |
|             | G LO   | 0.71 | 0.37 | 0.91 | 0.24        | 0.01 | 0.78 | 0.44 | 0.94 | 0.12        | 0.01 | 0.57 | 0.27 | 0.83 | 0.69        | 0.05 |
|             | G L    | 0.73 | 0.40 | 0.92 | 0.19        | 0.01 | 0.71 | 0.38 | 0.91 | 0.23        | 0.01 | 0.68 | 0.37 | 0.88 | 0.27        | 0.01 |
|             | LO L   | 0.54 | 0.24 | 0.81 | 0.84        | 0.05 | 0.55 | 0.25 | 0.82 | 0.77        | 0.03 | 0.57 | 0.27 | 0.82 | 0.68        | 0.03 |
| <i>Sal</i>  | GO G   | 0.43 | 0.17 | 0.73 | 0.68        | 0.03 | 0.16 | 0.04 | 0.51 | 0.06        | 0.01 | 0.17 | 0.04 | 0.50 | 0.05        | 0.01 |
|             | GO LO  | 0.61 | 0.29 | 0.86 | 0.53        | 0.02 | 0.57 | 0.26 | 0.84 | 0.70        | 0.05 | 0.63 | 0.30 | 0.88 | 0.49        | 0.02 |
|             | GO L   | 0.46 | 0.20 | 0.75 | 0.84        | 0.05 | 0.29 | 0.09 | 0.61 | 0.22        | 0.01 | 0.54 | 0.25 | 0.81 | 0.80        | 0.05 |
|             | G LO   | 0.68 | 0.36 | 0.89 | 0.29        | 0.01 | 0.76 | 0.42 | 0.93 | 0.14        | 0.01 | 0.78 | 0.44 | 0.94 | 0.12        | 0.01 |
|             | G L    | 0.61 | 0.31 | 0.84 | 0.52        | 0.01 | 0.68 | 0.37 | 0.89 | 0.29        | 0.02 | 0.75 | 0.43 | 0.92 | 0.13        | 0.01 |
|             | LO L   | 0.38 | 0.14 | 0.69 | 0.47        | 0.01 | 0.36 | 0.13 | 0.67 | 0.40        | 0.03 | 0.42 | 0.17 | 0.72 | 0.65        | 0.03 |
| <i>Sda</i>  | GO G   | 0.20 | 0.05 | 0.54 | 0.08        | 0.02 | 0.37 | 0.13 | 0.69 | 0.46        | 0.02 | 0.27 | 0.08 | 0.60 | 0.18        | 0.01 |
|             | GO LO  | 0.04 | 0.00 | 0.28 | <b>0.00</b> | 0.01 | 0.16 | 0.04 | 0.51 | 0.06        | 0.01 | 0.24 | 0.07 | 0.58 | 0.14        | 0.01 |
|             | GO L   | 0.18 | 0.05 | 0.49 | 0.04        | 0.01 | 0.39 | 0.15 | 0.70 | 0.53        | 0.05 | 0.23 | 0.07 | 0.54 | 0.09        | 0.01 |
|             | G LO   | 0.35 | 0.12 | 0.67 | 0.39        | 0.03 | 0.33 | 0.11 | 0.65 | 0.32        | 0.01 | 0.49 | 0.21 | 0.78 | 0.96        | 0.03 |
|             | G L    | 0.57 | 0.26 | 0.83 | 0.69        | 0.05 | 0.63 | 0.31 | 0.86 | 0.47        | 0.03 | 0.50 | 0.22 | 0.78 | 0.99        | 0.05 |
|             | LO L   | 0.79 | 0.48 | 0.94 | 0.07        | 0.01 | 0.84 | 0.54 | 0.96 | 0.03        | 0.01 | 0.52 | 0.23 | 0.79 | 0.92        | 0.02 |
| <i>Sdq</i>  | GO G   | 0.90 | 0.61 | 0.98 | <b>0.01</b> | 0.01 | 0.92 | 0.65 | 0.99 | <b>0.00</b> | 0.01 | 0.90 | 0.61 | 0.98 | <b>0.01</b> | 0.01 |
|             | GO LO  | 0.59 | 0.28 | 0.85 | 0.62        | 0.05 | 0.61 | 0.29 | 0.86 | 0.53        | 0.03 | 0.61 | 0.29 | 0.86 | 0.53        | 0.05 |
|             | GO L   | 0.70 | 0.39 | 0.89 | 0.23        | 0.01 | 0.64 | 0.33 | 0.87 | 0.41        | 0.02 | 0.70 | 0.39 | 0.89 | 0.23        | 0.01 |
|             | G LO   | 0.33 | 0.11 | 0.65 | 0.32        | 0.01 | 0.24 | 0.07 | 0.58 | 0.14        | 0.01 | 0.33 | 0.11 | 0.65 | 0.32        | 0.01 |
|             | G L    | 0.39 | 0.15 | 0.70 | 0.53        | 0.03 | 0.39 | 0.15 | 0.70 | 0.54        | 0.05 | 0.39 | 0.15 | 0.70 | 0.53        | 0.03 |
|             | LO L   | 0.64 | 0.33 | 0.87 | 0.40        | 0.02 | 0.68 | 0.36 | 0.89 | 0.29        | 0.01 | 0.64 | 0.33 | 0.87 | 0.40        | 0.02 |
| <i>Sdr</i>  | GO G   | 0.90 | 0.61 | 0.98 | <b>0.01</b> | 0.01 | 0.92 | 0.65 | 0.99 | <b>0.00</b> | 0.01 | 0.90 | 0.61 | 0.98 | <b>0.01</b> | 0.01 |
|             | GO LO  | 0.61 | 0.29 | 0.86 | 0.53        | 0.03 | 0.63 | 0.31 | 0.87 | 0.46        | 0.05 | 0.61 | 0.29 | 0.86 | 0.53        | 0.03 |

|            |       |      |      |      |             |      |      |      |      |      |      |      |      |      |             |      |
|------------|-------|------|------|------|-------------|------|------|------|------|------|------|------|------|------|-------------|------|
|            | GO L  | 0.70 | 0.39 | 0.89 | 0.23        | 0.01 | 0.66 | 0.35 | 0.88 | 0.34 | 0.01 | 0.70 | 0.39 | 0.89 | 0.23        | 0.01 |
|            | G LO  | 0.33 | 0.11 | 0.65 | 0.32        | 0.01 | 0.27 | 0.08 | 0.60 | 0.19 | 0.01 | 0.33 | 0.11 | 0.65 | 0.32        | 0.01 |
|            | G L   | 0.39 | 0.15 | 0.70 | 0.54        | 0.05 | 0.36 | 0.13 | 0.67 | 0.40 | 0.02 | 0.39 | 0.15 | 0.70 | 0.54        | 0.05 |
|            | LO L  | 0.64 | 0.33 | 0.87 | 0.40        | 0.02 | 0.63 | 0.32 | 0.86 | 0.46 | 0.03 | 0.64 | 0.33 | 0.87 | 0.40        | 0.02 |
| <i>Sdv</i> | GO G  | 0.20 | 0.06 | 0.52 | 0.07        | 0.01 | 0.59 | 0.28 | 0.84 | 0.61 | 0.03 | 0.45 | 0.18 | 0.75 | 0.78        | 0.03 |
|            | GO LO | 0.02 | 0.00 | 0.21 | <b>0.00</b> | 0.01 | 0.33 | 0.11 | 0.66 | 0.33 | 0.01 | 0.37 | 0.13 | 0.69 | 0.46        | 0.01 |
|            | GO L  | 0.23 | 0.07 | 0.56 | 0.11        | 0.02 | 0.45 | 0.19 | 0.74 | 0.76 | 0.05 | 0.57 | 0.28 | 0.82 | 0.67        | 0.01 |
|            | G LO  | 0.27 | 0.08 | 0.59 | 0.17        | 0.03 | 0.24 | 0.07 | 0.56 | 0.13 | 0.01 | 0.51 | 0.21 | 0.81 | 0.96        | 0.05 |
|            | G L   | 0.57 | 0.28 | 0.82 | 0.67        | 0.05 | 0.34 | 0.12 | 0.66 | 0.36 | 0.01 | 0.61 | 0.29 | 0.85 | 0.55        | 0.01 |
|            | LO L  | 0.82 | 0.51 | 0.95 | 0.04        | 0.01 | 0.63 | 0.31 | 0.86 | 0.48 | 0.02 | 0.57 | 0.28 | 0.82 | 0.68        | 0.02 |
| <i>Sha</i> | GO G  | 0.35 | 0.12 | 0.67 | 0.39        | 0.01 | 0.41 | 0.16 | 0.72 | 0.61 | 0.02 | 0.41 | 0.16 | 0.72 | 0.60        | 0.02 |
|            | GO LO | 0.63 | 0.30 | 0.88 | 0.49        | 0.03 | 0.49 | 0.20 | 0.79 | 0.96 | 0.05 | 0.57 | 0.26 | 0.84 | 0.70        | 0.05 |
|            | GO L  | 0.55 | 0.26 | 0.82 | 0.76        | 0.05 | 0.59 | 0.26 | 0.85 | 0.64 | 0.03 | 0.57 | 0.27 | 0.83 | 0.68        | 0.03 |
|            | G LO  | 0.82 | 0.50 | 0.95 | 0.05        | 0.01 | 0.63 | 0.32 | 0.86 | 0.44 | 0.01 | 0.71 | 0.39 | 0.91 | 0.21        | 0.01 |
|            | G L   | 0.70 | 0.38 | 0.89 | 0.23        | 0.01 | 0.71 | 0.40 | 0.90 | 0.19 | 0.01 | 0.64 | 0.33 | 0.87 | 0.40        | 0.01 |
|            | LO L  | 0.36 | 0.13 | 0.67 | 0.40        | 0.02 | 0.64 | 0.33 | 0.87 | 0.40 | 0.01 | 0.39 | 0.15 | 0.70 | 0.54        | 0.01 |
| <i>Shv</i> | GO G  | 0.39 | 0.15 | 0.70 | 0.52        | 0.01 | 0.59 | 0.28 | 0.84 | 0.61 | 0.05 | 0.35 | 0.12 | 0.67 | 0.38        | 0.01 |
|            | GO LO | 0.55 | 0.26 | 0.81 | 0.77        | 0.03 | 0.78 | 0.44 | 0.94 | 0.11 | 0.01 | 0.55 | 0.24 | 0.82 | 0.79        | 0.05 |
|            | GO L  | 0.59 | 0.28 | 0.84 | 0.62        | 0.02 | 0.70 | 0.38 | 0.90 | 0.24 | 0.01 | 0.64 | 0.33 | 0.87 | 0.40        | 0.02 |
|            | G LO  | 0.65 | 0.33 | 0.88 | 0.39        | 0.01 | 0.73 | 0.40 | 0.92 | 0.18 | 0.01 | 0.73 | 0.38 | 0.92 | 0.21        | 0.01 |
|            | G L   | 0.75 | 0.42 | 0.93 | 0.15        | 0.01 | 0.59 | 0.30 | 0.83 | 0.59 | 0.03 | 0.68 | 0.36 | 0.89 | 0.29        | 0.01 |
|            | LO L  | 0.52 | 0.23 | 0.79 | 0.92        | 0.05 | 0.39 | 0.16 | 0.69 | 0.53 | 0.02 | 0.45 | 0.18 | 0.74 | 0.76        | 0.03 |
| <i>Skv</i> | GO G  | 0.63 | 0.31 | 0.87 | 0.47        | 0.03 | 0.73 | 0.39 | 0.92 | 0.19 | 0.01 | 0.73 | 0.41 | 0.92 | 0.17        | 0.01 |
|            | GO LO | 0.35 | 0.12 | 0.67 | 0.39        | 0.01 | 0.31 | 0.10 | 0.63 | 0.26 | 0.02 | 0.37 | 0.14 | 0.68 | 0.45        | 0.02 |
|            | GO L  | 0.48 | 0.21 | 0.77 | 0.92        | 0.05 | 0.50 | 0.22 | 0.78 | 0.99 | 0.05 | 0.48 | 0.21 | 0.76 | 0.92        | 0.05 |
|            | G LO  | 0.22 | 0.06 | 0.58 | 0.14        | 0.01 | 0.18 | 0.04 | 0.52 | 0.07 | 0.01 | 0.24 | 0.06 | 0.61 | 0.18        | 0.01 |
|            | G L   | 0.34 | 0.12 | 0.65 | 0.35        | 0.01 | 0.29 | 0.09 | 0.61 | 0.21 | 0.01 | 0.18 | 0.05 | 0.50 | 0.05        | 0.01 |
|            | LO L  | 0.64 | 0.33 | 0.87 | 0.41        | 0.02 | 0.64 | 0.33 | 0.87 | 0.41 | 0.03 | 0.63 | 0.30 | 0.87 | 0.50        | 0.03 |
| <i>Smc</i> | GO G  | 0.43 | 0.16 | 0.74 | 0.70        | 0.03 | 0.76 | 0.39 | 0.94 | 0.18 | 0.01 | 0.53 | 0.23 | 0.81 | 0.87        | 0.05 |
|            | GO LO | 0.63 | 0.32 | 0.86 | 0.44        | 0.02 | 0.61 | 0.29 | 0.86 | 0.55 | 0.01 | 0.59 | 0.28 | 0.84 | 0.60        | 0.01 |
|            | GO L  | 0.73 | 0.42 | 0.91 | 0.15        | 0.01 | 0.71 | 0.38 | 0.91 | 0.24 | 0.01 | 0.71 | 0.39 | 0.91 | 0.22        | 0.01 |
|            | G LO  | 0.71 | 0.39 | 0.91 | 0.22        | 0.01 | 0.49 | 0.20 | 0.78 | 0.96 | 0.05 | 0.59 | 0.28 | 0.84 | 0.61        | 0.02 |
|            | G L   | 0.73 | 0.39 | 0.92 | 0.20        | 0.01 | 0.52 | 0.24 | 0.79 | 0.92 | 0.03 | 0.71 | 0.40 | 0.90 | 0.19        | 0.01 |
|            | LO L  | 0.54 | 0.24 | 0.81 | 0.84        | 0.05 | 0.59 | 0.29 | 0.83 | 0.60 | 0.02 | 0.59 | 0.27 | 0.85 | 0.63        | 0.03 |
| <i>Smr</i> | GO G  | 0.40 | 0.15 | 0.71 | 0.56        | 0.01 | 0.48 | 0.19 | 0.79 | 0.92 | 0.03 | 0.35 | 0.11 | 0.69 | 0.43        | 0.01 |
|            | GO LO | 0.29 | 0.09 | 0.62 | 0.23        | 0.01 | 0.48 | 0.20 | 0.77 | 0.91 | 0.02 | 0.12 | 0.03 | 0.42 | 0.02        | 0.01 |
|            | GO L  | 0.32 | 0.11 | 0.64 | 0.30        | 0.01 | 0.50 | 0.22 | 0.78 | 0.99 | 0.05 | 0.20 | 0.06 | 0.50 | 0.05        | 0.01 |
|            | G LO  | 0.43 | 0.17 | 0.73 | 0.69        | 0.02 | 0.46 | 0.19 | 0.76 | 0.82 | 0.01 | 0.53 | 0.22 | 0.82 | 0.88        | 0.03 |
|            | G L   | 0.52 | 0.24 | 0.79 | 0.92        | 0.05 | 0.46 | 0.20 | 0.75 | 0.84 | 0.01 | 0.54 | 0.24 | 0.81 | 0.85        | 0.02 |
|            | LO L  | 0.54 | 0.25 | 0.80 | 0.84        | 0.03 | 0.55 | 0.26 | 0.81 | 0.76 | 0.01 | 0.52 | 0.24 | 0.79 | 0.92        | 0.05 |
| <i>Sp</i>  | GO G  | 0.80 | 0.45 | 0.95 | 0.10        | 0.01 | 0.76 | 0.39 | 0.94 | 0.18 | 0.01 | 0.92 | 0.65 | 0.99 | <b>0.00</b> | 0.01 |
|            | GO LO | 0.53 | 0.22 | 0.82 | 0.88        | 0.03 | 0.59 | 0.27 | 0.85 | 0.62 | 0.01 | 0.57 | 0.24 | 0.85 | 0.73        | 0.03 |
|            | GO L  | 0.75 | 0.41 | 0.93 | 0.16        | 0.01 | 0.75 | 0.42 | 0.92 | 0.14 | 0.01 | 0.79 | 0.44 | 0.94 | 0.11        | 0.01 |
|            | G LO  | 0.37 | 0.13 | 0.70 | 0.48        | 0.02 | 0.49 | 0.20 | 0.78 | 0.96 | 0.05 | 0.39 | 0.14 | 0.71 | 0.55        | 0.02 |
|            | G L   | 0.48 | 0.21 | 0.77 | 0.92        | 0.05 | 0.55 | 0.26 | 0.81 | 0.76 | 0.03 | 0.52 | 0.24 | 0.79 | 0.92        | 0.05 |
|            | LO L  | 0.70 | 0.38 | 0.89 | 0.23        | 0.01 | 0.57 | 0.27 | 0.82 | 0.68 | 0.02 | 0.66 | 0.35 | 0.87 | 0.33        | 0.01 |
| <i>Spc</i> | GO G  | 0.86 | 0.56 | 0.97 | 0.02        | 0.01 | 0.84 | 0.53 | 0.96 | 0.03 | 0.01 | 0.88 | 0.59 | 0.97 | 0.01        | 0.01 |
|            | GO LO | 0.55 | 0.24 | 0.83 | 0.79        | 0.03 | 0.55 | 0.23 | 0.84 | 0.80 | 0.03 | 0.55 | 0.24 | 0.83 | 0.79        | 0.03 |
|            | GO L  | 0.77 | 0.45 | 0.93 | 0.10        | 0.01 | 0.79 | 0.48 | 0.94 | 0.07 | 0.01 | 0.77 | 0.45 | 0.93 | 0.10        | 0.01 |
|            | G LO  | 0.41 | 0.15 | 0.73 | 0.62        | 0.02 | 0.37 | 0.13 | 0.69 | 0.46 | 0.02 | 0.41 | 0.15 | 0.73 | 0.62        | 0.02 |

|            |       |      |      |      |      |      |      |      |      |      |      |      |      |      |             |      |
|------------|-------|------|------|------|------|------|------|------|------|------|------|------|------|------|-------------|------|
|            | G L   | 0.52 | 0.24 | 0.79 | 0.92 | 0.05 | 0.50 | 0.22 | 0.78 | 0.99 | 0.05 | 0.52 | 0.24 | 0.79 | 0.92        | 0.05 |
|            | LO L  | 0.64 | 0.33 | 0.87 | 0.40 | 0.01 | 0.70 | 0.38 | 0.89 | 0.23 | 0.01 | 0.63 | 0.31 | 0.86 | 0.47        | 0.01 |
| <i>Spd</i> | GO G  | 0.65 | 0.33 | 0.88 | 0.39 | 0.01 | 0.69 | 0.37 | 0.90 | 0.26 | 0.01 | 0.63 | 0.31 | 0.87 | 0.46        | 0.02 |
|            | GO LO | 0.39 | 0.14 | 0.72 | 0.55 | 0.03 | 0.43 | 0.16 | 0.74 | 0.70 | 0.02 | 0.35 | 0.11 | 0.69 | 0.42        | 0.01 |
|            | GO L  | 0.43 | 0.17 | 0.73 | 0.69 | 0.05 | 0.46 | 0.19 | 0.76 | 0.85 | 0.03 | 0.38 | 0.14 | 0.69 | 0.48        | 0.03 |
|            | G LO  | 0.18 | 0.05 | 0.50 | 0.05 | 0.01 | 0.16 | 0.04 | 0.49 | 0.04 | 0.01 | 0.18 | 0.05 | 0.50 | 0.05        | 0.01 |
|            | G L   | 0.32 | 0.12 | 0.63 | 0.28 | 0.01 | 0.25 | 0.08 | 0.57 | 0.14 | 0.01 | 0.36 | 0.13 | 0.67 | 0.40        | 0.01 |
|            | LO L  | 0.61 | 0.31 | 0.84 | 0.52 | 0.02 | 0.48 | 0.21 | 0.76 | 0.92 | 0.05 | 0.61 | 0.30 | 0.84 | 0.53        | 0.05 |
| <i>Sq</i>  | GO G  | 0.43 | 0.17 | 0.74 | 0.70 | 0.05 | 0.61 | 0.30 | 0.85 | 0.52 | 0.02 | 0.80 | 0.47 | 0.95 | 0.08        | 0.01 |
|            | GO LO | 0.61 | 0.30 | 0.85 | 0.52 | 0.02 | 0.69 | 0.37 | 0.90 | 0.26 | 0.01 | 0.73 | 0.41 | 0.92 | 0.17        | 0.01 |
|            | GO L  | 0.71 | 0.41 | 0.90 | 0.18 | 0.01 | 0.73 | 0.42 | 0.91 | 0.15 | 0.01 | 0.73 | 0.42 | 0.91 | 0.15        | 0.01 |
|            | G LO  | 0.67 | 0.34 | 0.89 | 0.33 | 0.01 | 0.57 | 0.27 | 0.83 | 0.69 | 0.05 | 0.47 | 0.20 | 0.76 | 0.87        | 0.03 |
|            | G L   | 0.79 | 0.46 | 0.94 | 0.09 | 0.01 | 0.63 | 0.32 | 0.85 | 0.46 | 0.01 | 0.52 | 0.23 | 0.79 | 0.92        | 0.05 |
|            | LO L  | 0.59 | 0.28 | 0.84 | 0.61 | 0.03 | 0.57 | 0.28 | 0.82 | 0.67 | 0.03 | 0.61 | 0.30 | 0.85 | 0.53        | 0.02 |
| <i>Ssk</i> | GO G  | 0.67 | 0.34 | 0.89 | 0.33 | 0.03 | 0.82 | 0.45 | 0.96 | 0.09 | 0.01 | 0.88 | 0.58 | 0.97 | 0.02        | 0.01 |
|            | GO LO | 0.33 | 0.11 | 0.65 | 0.32 | 0.01 | 0.31 | 0.10 | 0.64 | 0.27 | 0.02 | 0.33 | 0.11 | 0.66 | 0.33        | 0.02 |
|            | GO L  | 0.34 | 0.13 | 0.65 | 0.33 | 0.02 | 0.55 | 0.25 | 0.82 | 0.77 | 0.05 | 0.43 | 0.18 | 0.72 | 0.67        | 0.05 |
|            | G LO  | 0.14 | 0.03 | 0.47 | 0.03 | 0.01 | 0.16 | 0.04 | 0.49 | 0.04 | 0.01 | 0.16 | 0.04 | 0.51 | 0.06        | 0.01 |
|            | G L   | 0.16 | 0.04 | 0.48 | 0.04 | 0.01 | 0.20 | 0.06 | 0.50 | 0.05 | 0.01 | 0.18 | 0.05 | 0.49 | 0.05        | 0.01 |
|            | LO L  | 0.43 | 0.18 | 0.72 | 0.67 | 0.05 | 0.64 | 0.33 | 0.87 | 0.41 | 0.03 | 0.64 | 0.33 | 0.87 | 0.40        | 0.03 |
| <i>Std</i> | GO G  | 0.63 | 0.32 | 0.86 | 0.45 | 0.02 | 0.43 | 0.16 | 0.74 | 0.70 | 0.05 | 0.57 | 0.27 | 0.83 | 0.69        | 0.05 |
|            | GO LO | 0.63 | 0.31 | 0.87 | 0.46 | 0.03 | 0.63 | 0.31 | 0.87 | 0.46 | 0.01 | 0.59 | 0.27 | 0.85 | 0.62        | 0.03 |
|            | GO L  | 0.77 | 0.46 | 0.93 | 0.09 | 0.01 | 0.59 | 0.28 | 0.84 | 0.61 | 0.02 | 0.71 | 0.40 | 0.90 | 0.20        | 0.01 |
|            | G LO  | 0.59 | 0.28 | 0.84 | 0.60 | 0.05 | 0.73 | 0.41 | 0.92 | 0.16 | 0.01 | 0.59 | 0.28 | 0.84 | 0.60        | 0.02 |
|            | G L   | 0.71 | 0.40 | 0.90 | 0.19 | 0.01 | 0.57 | 0.28 | 0.82 | 0.67 | 0.03 | 0.70 | 0.39 | 0.89 | 0.23        | 0.01 |
|            | LO L  | 0.68 | 0.36 | 0.89 | 0.29 | 0.01 | 0.38 | 0.14 | 0.68 | 0.46 | 0.01 | 0.64 | 0.34 | 0.86 | 0.39        | 0.01 |
| <i>Str</i> | GO G  | 0.67 | 0.35 | 0.89 | 0.32 | 0.01 | 0.78 | 0.43 | 0.94 | 0.13 | 0.01 | 0.57 | 0.27 | 0.83 | 0.69        | 0.01 |
|            | GO LO | 0.65 | 0.33 | 0.88 | 0.38 | 0.01 | 0.65 | 0.32 | 0.88 | 0.41 | 0.03 | 0.43 | 0.17 | 0.73 | 0.69        | 0.01 |
|            | GO L  | 0.73 | 0.40 | 0.92 | 0.18 | 0.01 | 0.77 | 0.44 | 0.93 | 0.11 | 0.01 | 0.52 | 0.23 | 0.79 | 0.92        | 0.05 |
|            | G LO  | 0.51 | 0.22 | 0.79 | 0.96 | 0.05 | 0.31 | 0.10 | 0.64 | 0.29 | 0.02 | 0.39 | 0.15 | 0.70 | 0.52        | 0.01 |
|            | G L   | 0.63 | 0.31 | 0.86 | 0.47 | 0.02 | 0.50 | 0.22 | 0.78 | 0.99 | 0.05 | 0.46 | 0.20 | 0.75 | 0.84        | 0.02 |
|            | LO L  | 0.59 | 0.29 | 0.83 | 0.60 | 0.03 | 0.71 | 0.40 | 0.90 | 0.20 | 0.01 | 0.54 | 0.24 | 0.81 | 0.85        | 0.03 |
| <i>Sv</i>  | GO G  | 0.61 | 0.27 | 0.87 | 0.57 | 0.03 | 0.65 | 0.32 | 0.88 | 0.41 | 0.02 | 0.67 | 0.34 | 0.89 | 0.33        | 0.03 |
|            | GO LO | 0.71 | 0.39 | 0.91 | 0.21 | 0.01 | 0.73 | 0.41 | 0.92 | 0.17 | 0.01 | 0.82 | 0.48 | 0.96 | 0.07        | 0.01 |
|            | GO L  | 0.77 | 0.45 | 0.93 | 0.10 | 0.01 | 0.82 | 0.52 | 0.95 | 0.04 | 0.01 | 0.82 | 0.51 | 0.95 | 0.04        | 0.01 |
|            | G LO  | 0.59 | 0.27 | 0.85 | 0.63 | 0.05 | 0.57 | 0.25 | 0.84 | 0.71 | 0.05 | 0.76 | 0.42 | 0.93 | 0.14        | 0.02 |
|            | G L   | 0.79 | 0.47 | 0.94 | 0.08 | 0.01 | 0.77 | 0.46 | 0.93 | 0.09 | 0.01 | 0.75 | 0.44 | 0.92 | 0.13        | 0.01 |
|            | LO L  | 0.66 | 0.35 | 0.88 | 0.34 | 0.02 | 0.63 | 0.31 | 0.86 | 0.48 | 0.03 | 0.54 | 0.25 | 0.80 | 0.84        | 0.05 |
| <i>Sxp</i> | GO G  | 0.37 | 0.13 | 0.69 | 0.46 | 0.02 | 0.43 | 0.17 | 0.74 | 0.70 | 0.03 | 0.76 | 0.44 | 0.93 | 0.13        | 0.01 |
|            | GO LO | 0.57 | 0.27 | 0.83 | 0.68 | 0.05 | 0.61 | 0.30 | 0.85 | 0.52 | 0.02 | 0.73 | 0.40 | 0.92 | 0.18        | 0.01 |
|            | GO L  | 0.73 | 0.42 | 0.91 | 0.16 | 0.01 | 0.68 | 0.36 | 0.89 | 0.29 | 0.01 | 0.95 | 0.69 | 0.99 | <b>0.00</b> | 0.01 |
|            | G LO  | 0.73 | 0.41 | 0.92 | 0.16 | 0.01 | 0.73 | 0.41 | 0.92 | 0.17 | 0.01 | 0.51 | 0.22 | 0.79 | 0.96        | 0.05 |
|            | G L   | 0.88 | 0.57 | 0.97 | 0.02 | 0.01 | 0.80 | 0.47 | 0.95 | 0.08 | 0.01 | 0.71 | 0.40 | 0.90 | 0.19        | 0.02 |
|            | LO L  | 0.63 | 0.31 | 0.86 | 0.48 | 0.03 | 0.55 | 0.26 | 0.81 | 0.76 | 0.05 | 0.64 | 0.33 | 0.87 | 0.41        | 0.03 |
| <i>Sz</i>  | GO G  | 0.86 | 0.54 | 0.97 | 0.03 | 0.01 | 0.82 | 0.50 | 0.95 | 0.05 | 0.01 | 0.84 | 0.53 | 0.96 | 0.03        | 0.01 |
|            | GO LO | 0.57 | 0.24 | 0.85 | 0.73 | 0.02 | 0.65 | 0.32 | 0.88 | 0.41 | 0.01 | 0.65 | 0.32 | 0.88 | 0.41        | 0.01 |
|            | GO L  | 0.79 | 0.46 | 0.94 | 0.09 | 0.01 | 0.80 | 0.49 | 0.95 | 0.06 | 0.01 | 0.79 | 0.46 | 0.94 | 0.09        | 0.01 |
|            | G LO  | 0.45 | 0.18 | 0.76 | 0.79 | 0.03 | 0.51 | 0.21 | 0.80 | 0.96 | 0.05 | 0.53 | 0.23 | 0.81 | 0.87        | 0.05 |
|            | G L   | 0.54 | 0.25 | 0.80 | 0.84 | 0.05 | 0.63 | 0.32 | 0.86 | 0.47 | 0.02 | 0.59 | 0.29 | 0.83 | 0.60        | 0.03 |

|            |       |      |      |      |             |      |      |      |      |      |      |      |      |      |             |      |
|------------|-------|------|------|------|-------------|------|------|------|------|------|------|------|------|------|-------------|------|
|            | LO L  | 0.64 | 0.33 | 0.87 | 0.40        | 0.01 | 0.59 | 0.29 | 0.83 | 0.60 | 0.03 | 0.59 | 0.29 | 0.83 | 0.60        | 0.02 |
| <i>Vm</i>  | GO G  | 0.69 | 0.37 | 0.90 | 0.26        | 0.01 | 0.86 | 0.53 | 0.97 | 0.03 | 0.01 | 0.84 | 0.51 | 0.96 | 0.04        | 0.01 |
|            | GO LO | 0.43 | 0.17 | 0.73 | 0.68        | 0.03 | 0.39 | 0.14 | 0.71 | 0.53 | 0.03 | 0.67 | 0.35 | 0.89 | 0.32        | 0.02 |
|            | GO L  | 0.54 | 0.25 | 0.80 | 0.84        | 0.05 | 0.59 | 0.29 | 0.83 | 0.60 | 0.05 | 0.70 | 0.39 | 0.89 | 0.23        | 0.01 |
|            | G LO  | 0.18 | 0.04 | 0.52 | 0.07        | 0.01 | 0.14 | 0.03 | 0.50 | 0.05 | 0.01 | 0.29 | 0.09 | 0.61 | 0.21        | 0.01 |
|            | G L   | 0.32 | 0.11 | 0.63 | 0.29        | 0.01 | 0.30 | 0.11 | 0.62 | 0.24 | 0.01 | 0.41 | 0.16 | 0.71 | 0.60        | 0.05 |
|            | LO L  | 0.61 | 0.31 | 0.84 | 0.52        | 0.02 | 0.64 | 0.34 | 0.86 | 0.39 | 0.02 | 0.61 | 0.31 | 0.84 | 0.52        | 0.03 |
| <i>Vmc</i> | GO G  | 0.39 | 0.14 | 0.71 | 0.55        | 0.03 | 0.37 | 0.12 | 0.70 | 0.49 | 0.03 | 0.53 | 0.23 | 0.81 | 0.87        | 0.05 |
|            | GO LO | 0.63 | 0.32 | 0.86 | 0.44        | 0.02 | 0.67 | 0.35 | 0.89 | 0.32 | 0.02 | 0.61 | 0.30 | 0.85 | 0.52        | 0.01 |
|            | GO L  | 0.75 | 0.43 | 0.92 | 0.13        | 0.01 | 0.73 | 0.42 | 0.91 | 0.16 | 0.01 | 0.73 | 0.40 | 0.92 | 0.18        | 0.01 |
|            | G LO  | 0.78 | 0.45 | 0.94 | 0.10        | 0.01 | 0.80 | 0.47 | 0.95 | 0.08 | 0.01 | 0.59 | 0.28 | 0.84 | 0.61        | 0.02 |
|            | G L   | 0.75 | 0.41 | 0.93 | 0.16        | 0.01 | 0.70 | 0.36 | 0.90 | 0.27 | 0.01 | 0.80 | 0.49 | 0.95 | 0.06        | 0.01 |
|            | LO L  | 0.52 | 0.23 | 0.79 | 0.92        | 0.05 | 0.52 | 0.23 | 0.79 | 0.92 | 0.05 | 0.59 | 0.27 | 0.85 | 0.63        | 0.03 |
| <i>Vmp</i> | GO G  | 0.69 | 0.37 | 0.90 | 0.26        | 0.01 | 0.86 | 0.53 | 0.97 | 0.03 | 0.01 | 0.84 | 0.51 | 0.96 | 0.04        | 0.01 |
|            | GO LO | 0.43 | 0.17 | 0.73 | 0.68        | 0.03 | 0.39 | 0.14 | 0.71 | 0.53 | 0.03 | 0.67 | 0.35 | 0.89 | 0.32        | 0.02 |
|            | GO L  | 0.54 | 0.25 | 0.80 | 0.84        | 0.05 | 0.59 | 0.29 | 0.83 | 0.60 | 0.05 | 0.70 | 0.39 | 0.89 | 0.23        | 0.01 |
|            | G LO  | 0.18 | 0.04 | 0.52 | 0.07        | 0.01 | 0.14 | 0.03 | 0.50 | 0.05 | 0.01 | 0.29 | 0.09 | 0.61 | 0.21        | 0.01 |
|            | G L   | 0.32 | 0.11 | 0.63 | 0.29        | 0.01 | 0.30 | 0.11 | 0.62 | 0.24 | 0.01 | 0.41 | 0.16 | 0.71 | 0.60        | 0.05 |
|            | LO L  | 0.61 | 0.31 | 0.84 | 0.52        | 0.02 | 0.64 | 0.34 | 0.86 | 0.39 | 0.02 | 0.61 | 0.31 | 0.84 | 0.52        | 0.03 |
| <i>Vv</i>  | GO G  | 0.43 | 0.16 | 0.74 | 0.70        | 0.03 | 0.49 | 0.21 | 0.78 | 0.96 | 0.05 | 0.57 | 0.27 | 0.83 | 0.69        | 0.03 |
|            | GO LO | 0.63 | 0.32 | 0.86 | 0.44        | 0.02 | 0.67 | 0.36 | 0.88 | 0.31 | 0.02 | 0.65 | 0.34 | 0.87 | 0.37        | 0.01 |
|            | GO L  | 0.73 | 0.42 | 0.91 | 0.15        | 0.01 | 0.73 | 0.42 | 0.91 | 0.16 | 0.01 | 0.75 | 0.42 | 0.92 | 0.14        | 0.01 |
|            | G LO  | 0.69 | 0.36 | 0.90 | 0.28        | 0.01 | 0.71 | 0.39 | 0.91 | 0.22 | 0.01 | 0.59 | 0.28 | 0.84 | 0.61        | 0.02 |
|            | G L   | 0.71 | 0.37 | 0.91 | 0.24        | 0.01 | 0.70 | 0.36 | 0.90 | 0.28 | 0.01 | 0.71 | 0.40 | 0.90 | 0.19        | 0.01 |
|            | LO L  | 0.55 | 0.26 | 0.81 | 0.76        | 0.05 | 0.54 | 0.24 | 0.81 | 0.84 | 0.03 | 0.55 | 0.25 | 0.82 | 0.77        | 0.05 |
| <i>Vvc</i> | GO G  | 0.47 | 0.19 | 0.77 | 0.87        | 0.05 | 0.49 | 0.21 | 0.78 | 0.96 | 0.05 | 0.51 | 0.22 | 0.79 | 0.96        | 0.05 |
|            | GO LO | 0.71 | 0.40 | 0.91 | 0.20        | 0.01 | 0.71 | 0.39 | 0.91 | 0.21 | 0.01 | 0.61 | 0.30 | 0.85 | 0.52        | 0.01 |
|            | GO L  | 0.68 | 0.37 | 0.89 | 0.29        | 0.01 | 0.70 | 0.38 | 0.90 | 0.24 | 0.01 | 0.70 | 0.38 | 0.90 | 0.24        | 0.01 |
|            | G LO  | 0.71 | 0.37 | 0.91 | 0.24        | 0.01 | 0.71 | 0.38 | 0.91 | 0.23 | 0.01 | 0.59 | 0.28 | 0.84 | 0.61        | 0.02 |
|            | G L   | 0.68 | 0.35 | 0.89 | 0.32        | 0.02 | 0.68 | 0.35 | 0.89 | 0.32 | 0.02 | 0.68 | 0.37 | 0.88 | 0.27        | 0.01 |
|            | LO L  | 0.54 | 0.25 | 0.80 | 0.84        | 0.03 | 0.52 | 0.23 | 0.79 | 0.92 | 0.03 | 0.57 | 0.26 | 0.83 | 0.70        | 0.03 |
| <i>Vvv</i> | GO G  | 0.37 | 0.14 | 0.68 | 0.45        | 0.03 | 0.41 | 0.16 | 0.72 | 0.61 | 0.03 | 0.86 | 0.53 | 0.97 | 0.03        | 0.01 |
|            | GO LO | 0.57 | 0.27 | 0.83 | 0.68        | 0.05 | 0.57 | 0.26 | 0.83 | 0.70 | 0.05 | 0.76 | 0.42 | 0.93 | 0.14        | 0.01 |
|            | GO L  | 0.77 | 0.46 | 0.93 | 0.10        | 0.01 | 0.79 | 0.47 | 0.94 | 0.07 | 0.01 | 0.93 | 0.64 | 0.99 | <b>0.01</b> | 0.01 |
|            | G LO  | 0.65 | 0.33 | 0.88 | 0.39        | 0.02 | 0.61 | 0.30 | 0.85 | 0.52 | 0.02 | 0.49 | 0.20 | 0.78 | 0.96        | 0.05 |
|            | G L   | 0.89 | 0.61 | 0.98 | <b>0.01</b> | 0.01 | 0.84 | 0.51 | 0.96 | 0.04 | 0.01 | 0.71 | 0.40 | 0.90 | 0.19        | 0.02 |
|            | LO L  | 0.66 | 0.34 | 0.88 | 0.35        | 0.01 | 0.64 | 0.31 | 0.88 | 0.45 | 0.01 | 0.68 | 0.36 | 0.89 | 0.29        | 0.03 |

87

88
